# Supplementary material for: Evaluating glial and neuronal blood biomarkers GFAP and UCH-L1 as gradients of brain injury in concussive, subconcussive and non-concussive trauma: a prospective cohort study
Source: PubMed Central journal article supplement — BMJ Paediatr Open. 2019 Aug 25;3(1):e000473. doi: 10.1136/bmjpo-2019-000473 (PMC6721136; doi:10.1136/bmjpo-2019-000473), 2019-08-25
Supplement: bmjpo-2019-000473.draft_revisions.pdf [file bmjpo-2019-000473.draft_revisions.pdf]

# BMJ Paediatrics Open

BMJ Paediatrics Open is committed to open peer review. As part of this commitment we make the peer review history of every article we publish publicly available.

When an article is published we post the peer reviewers' comments and the authors' responses online. We also post the versions of the paper that were used during peer review. These are the versions that the peer review comments apply to.

The versions of the paper that follow are the versions that were submitted during the peer review process. They are not the versions of record or the final published versions. They should not be cited or distributed as the published version of this manuscript.

BMJ Paediatrics Open is an open access journal and the full, final, typeset and author-corrected version of record of the manuscript is available on our site with no access controls, subscription charges or pay-per-view fees (<http://bmjpaedsopen.bmj.com>).

If you have any questions on BMJ Paediatrics Open's open peer review process please email [info.bmjpo@bmj.com](mailto:info.bmjpo@bmj.com)

# BMJ Paediatrics Open

## Evaluating Glial and Neuronal Blood Biomarkers GFAP and UCH-L1 as Gradients of Brain Injury in Concussive, Subconcussive and Nonconcussive Trauma in a Large Cohort of Pediatric and Adult Trauma Patients Over Time

|                               |                                                                                                                                                                                                                                                                                                                                                                                                                                                                                                                                                                                                                                                                                                                                                                                                                                          |
|-------------------------------|------------------------------------------------------------------------------------------------------------------------------------------------------------------------------------------------------------------------------------------------------------------------------------------------------------------------------------------------------------------------------------------------------------------------------------------------------------------------------------------------------------------------------------------------------------------------------------------------------------------------------------------------------------------------------------------------------------------------------------------------------------------------------------------------------------------------------------------|
| Journal:                      | <i>BMJ Paediatrics Open</i>                                                                                                                                                                                                                                                                                                                                                                                                                                                                                                                                                                                                                                                                                                                                                                                                              |
| Manuscript ID                 | bmjpo-2019-000473                                                                                                                                                                                                                                                                                                                                                                                                                                                                                                                                                                                                                                                                                                                                                                                                                        |
| Article Type:                 | Original article                                                                                                                                                                                                                                                                                                                                                                                                                                                                                                                                                                                                                                                                                                                                                                                                                         |
| Date Submitted by the Author: | 25-Feb-2019                                                                                                                                                                                                                                                                                                                                                                                                                                                                                                                                                                                                                                                                                                                                                                                                                              |
| Complete List of Authors:     | Papa, Linda; Orlando Regional Medical Center, Emergency Medicine<br>Zonfrillo, Mark; Hasbro Children's Hospital<br>Welch, Robert; Wayne State University School of Medicine<br>Lewis, Lawrence; Washington University in Saint Louis<br>Braga, Carolina; Robert Wood Johnson University Hospital<br>Tan, Ciara; Orlando Regional Medical Center<br>Ameli, Neema; Orlando Regional Medical Center, Emergency Medicine<br>Lopez, Marco; Orlando Regional Medical Center, Emergency Medicine<br>Haeussler, Crystal; Orlando Regional Medical Center, Emergency Medicine<br>Mendez Giordano, Diego; Orlando Regional Medical Center, Emergency Medicine<br>Giordano, Philip; Orlando Regional Medical Center, Emergency Medicine<br>Ramirez, Jose; Arnold Palmer Hospital for Children<br>Mittal, Manoj; Children's Hospital of Philadelphia |
| Keywords:                     | Accident & Emergency, Adolescent Health, Biochemistry, General Paediatrics, Neurology                                                                                                                                                                                                                                                                                                                                                                                                                                                                                                                                                                                                                                                                                                                                                    |
|                               |                                                                                                                                                                                                                                                                                                                                                                                                                                                                                                                                                                                                                                                                                                                                                                                                                                          |

SCHOLARONE™  
Manuscripts

1  
2  
3 **Evaluating Glial and Neuronal Blood Biomarkers GFAP and UCH-L1 as Gradients**  
4  
5 **of Brain Injury in Concussive, Subconcussive and Nonconcussive Trauma in a**  
6  
7 **Large Cohort of Pediatric and Adult Trauma Patients Over Time**  
8  
9

10  
11  
12 *Linda Papa, MDCM, MSc<sup>1,2</sup>; Mark R. Zonfrillo, MD, MSCE<sup>3</sup>; Robert D. Welch, MD,*  
13  
14 *MS<sup>4</sup>; Lawrence M. Lewis, MD<sup>5</sup>; Carolina F. Braga, MD<sup>6</sup>; Ciara N. Tan, BS, MSHH<sup>1</sup>;*  
15  
16 *Neema J. Ameli, BS<sup>1</sup>; Marco A. Lopez, AS<sup>1</sup>; Crystal A. Haeussler, BS<sup>1</sup>; Diego Mendez*  
17  
18 *Giordano, BS<sup>1</sup>; Philip A. Giordano, MD<sup>1,2</sup>; Jose Ramirez, MD<sup>2</sup>; Manoj K. Mittal, MD<sup>7,8</sup>*  
19  
20  
21  
22

23  
24 <sup>1</sup>*Department of Emergency Medicine, Orlando Regional Medical Center, Orlando, Florida*

25  
26 <sup>2</sup>*Department of Pediatric Emergency Medicine, Arnold Palmer Hospital for Children, Orlando,*  
27  
28 *FL*

29  
30 <sup>3</sup>*Department of Emergency Medicine, Alpert Medical School of Brown University and Hasbro*  
31  
32 *Children's Hospital, Providence, RI*

33  
34 <sup>4</sup>*Department of Emergency Medicine, Wayne State University School of Medicine, Michigan*

35  
36 <sup>5</sup>*Division of Emergency Medicine, Washington University School of Medicine, Missouri*

37  
38 <sup>6</sup>*Department of Family Medicine and Community Health, Robert Wood Johnson University*  
39  
40 *Hospital, New Brunswick, NJ*

41  
42 <sup>7</sup>*Division of Emergency Medicine, Children's Hospital of Philadelphia, Philadelphia, PA*

43  
44 <sup>8</sup>*Department of Pediatrics, Perelman School of Medicine, University of Pennsylvania,*  
45  
46 *Philadelphia, PA*  
47  
48  
49  
50  
51  
52  
53  
54  
55  
56  
57  
58  
59  
60

**AUTHORS****Corresponding Author**

Linda Papa, MDCM, MSc

Director of Academic Clinical Research and Attending Emergency Physician

Department of Emergency Medicine

Orlando Regional Medical Center

86 W. Underwood (S-200)

Orlando, Florida, 32806

Tel.: 407-237-6329

Fax: 407-649-3083

[lpstat@aol.com](mailto:lpstat@aol.com)

**Mark R. Zonfrillo, MD, MSCE**

Attending Pediatric Emergency Physician & Associate Professor of Pediatrics

Department of Emergency Medicine, Alpert Medical School of Brown University and

Hasbro Children's Hospital, Providence, RI

[zonfrillo@brown.edu](mailto:zonfrillo@brown.edu)

**Robert D. Welch, MD, MS**

Clinical Professor

Department of Emergency Medicine, Wayne State University School of Medicine

[rwelch@med.wayne.edu](mailto:rwelch@med.wayne.edu)

1  
2  
3 **Lawrence M. Lewis, MD**  
4

5 Professor  
6

7 Division of Emergency Medicine, Washington University School of Medicine  
8

9  
10 [lewisl@wusm.wustl.edu](mailto:lewisl@wusm.wustl.edu)  
11  
12

13  
14  
15 **Carolina F. Braga, MD**  
16

17 Department of Family Medicine and Community Health  
18

19 Robert Wood Johnson University Hospital Residency Program  
20

21  
22 [cbraga1121@gmail.com](mailto:cbraga1121@gmail.com)  
23  
24

25  
26 **Ciara N. Tan, BS, MSHS**  
27

28 Department of Emergency Medicine  
29

30 Orlando Regional Medical Center  
31

32  
33 [Ciara.Tan@orlandohealth.com](mailto:Ciara.Tan@orlandohealth.com)  
34  
35

36  
37  
38 **Neema J. Ameli, BS**  
39

40 Department of Emergency Medicine  
41

42 Orlando Regional Medical Center  
43

44  
45 [Neema.ameli@orlandohealth.com](mailto:Neema.ameli@orlandohealth.com)  
46  
47

48  
49 **Marco A. Lopez, AS, CCRP**  
50

51 Department of Emergency Medicine  
52

53 Orlando Regional Medical Center  
54  
55  
56  
57  
58  
59  
60

1  
2  
3 [Marco.Lopez@orlandohealth.com](mailto:Marco.Lopez@orlandohealth.com)  
4  
5  
6

7  
8 **Crystal A. Haeussler, BS**  
9

10 Department of Emergency Medicine

11  
12 Orlando Regional Medical Center

13  
14 [crystalhaeussler@gmail.com](mailto:crystalhaeussler@gmail.com)  
15  
16  
17

18  
19 **Diego Mendez Giordano, BS**  
20

21 Department of Emergency Medicine

22  
23 Orlando Regional Medical Center

24  
25 [dmengio11@gmail.com](mailto:dmengio11@gmail.com)  
26  
27  
28

29  
30  
31 **Philip A. Giordano, MD**  
32

33 Corporate Director, Research Operations, Orlando Health

34  
35 Attending Emergency Physician

36  
37 Orlando Regional Medical Center

38  
39 [Philip.Giordano@orlandohealth.com](mailto:Philip.Giordano@orlandohealth.com)  
40  
41  
42

43  
44 **Jose Ramirez, MD**  
45

46 Program Director, Pediatric Emergency Medicine Fellowship

47  
48 Attending Pediatric Emergency Physician

49  
50 Arnold Palmer Hospital for Children

51  
52 [Jose.Ramirez@orlandohealth.com](mailto:Jose.Ramirez@orlandohealth.com)  
53  
54  
55  
56  
57  
58  
59  
60

1  
2  
3  
4  
5 **Manoj K. Mittal, MD**  
6

7 Co-Chair, QI and Patient Safety Committee & Director, Emergency Department  
8

9  
10 Extended Care Unit (EDECU)  
11

12 Division of Emergency Medicine  
13

14 Children's Hospital of Philadelphia  
15

16 Associate Professor of Clinical Pediatrics  
17

18 Perelman School of Medicine, University of Pennsylvania  
19

20  
21 [mittal@email.chop.edu](mailto:mittal@email.chop.edu)  
22  
23  
24  
25  
26  
27  
28  
29  
30  
31  
32  
33  
34  
35  
36  
37  
38  
39  
40  
41  
42  
43  
44  
45  
46  
47  
48  
49  
50  
51  
52  
53  
54  
55  
56  
57  
58  
59  
60

**ABSTRACT**

**OBJECTIVES:** To evaluate the ability of GFAP and UCH-L1 to detect concussion in children and adult trauma patients with a normal mental status and assess biomarker concentrations over time as gradients of injury in concussive and nonconcussive head and body trauma.

**DESIGN:** Large prospective cohort study.

**SETTING:** Three Level One Trauma Centers in the United States.

**PARTICIPANTS:** Pediatric and adult trauma patients of all ages, with and without head trauma, presenting with a normal mental status (GCS 15) within 4 hours of injury.

Rigorous screening for concussive symptoms was conducted. Of 3462 trauma patients screened, 751 were enrolled and 712 had biomarker data. Repeated blood sampling was conducted at 4, 8, 12, 16, 24, 36, 48, 60, 72, 84, 96, 108, 120, 132, 144, 156, 168 and 180 hours post-injury in adults.

**MAIN OUTCOMES:** Detection of concussion and gradients of injury in children versus adults by comparing three groups of patients: 1) those with concussion; 2) those with head trauma without overt signs of concussion (nonconcussive head trauma controls); and 3) those with peripheral (body) trauma without head trauma or concussion (nonconcussive body trauma controls).

**RESULTS:** A total of 1904 samples from 712 trauma patients were analyzed. Within 4 hours of injury, there were incremental increases in levels of both GFAP and UCH-L1 from nonconcussive body trauma (lowest), to mild elevations in nonconcussive head trauma, to highest levels in patients with concussion. In concussion patients, GFAP concentrations were significantly higher compared to body trauma controls ( $p < 0.001$ ) and



1  
2  
3 to head trauma controls ( $p < 0.001$ ) in both children and adults, after controlling for  
4 multiple comparisons. However, for UCH-L1 there were no significant differences  
5  
6 between concussion patients and head trauma controls ( $p = 0.894$ ) and between body  
7  
8 trauma and head trauma controls in children. The AUC for initial GFAP levels to detect  
9  
10 concussion was 0.80 (0.73-0.87) in children and 0.76 (0.71-0.80) in adults. This differed  
11  
12 significantly from UCH-L1 with AUCs of 0.62 (0.53-0.72) in children and 0.69 (0.64-  
13  
14 0.74) in adults.  
15  
16  
17  
18

19  
20 **CONCLUSIONS:** In a cohort of trauma patients with normal mental status, GFAP out-  
21  
22 performed UCH-L1 in detecting concussion in both children and adults. Blood levels of  
23  
24 GFAP and UCH-L1 showed incremental elevations across three injury groups, from  
25  
26 nonconcussive body trauma, to nonconcussive head trauma, to concussion. However,  
27  
28 UCH-L1 was expressed at much higher levels than GFAP in those with nonconcussive  
29  
30 trauma, particularly in children. Elevations in both biomarkers in patients with  
31  
32 nonconcussive head trauma may be reflective of a subconcussive brain injury. This will  
33  
34 require further study.  
35  
36  
37  
38  
39  
40

41 **Key Words:**

42  
43 Biomarkers; Concussion; Mild Traumatic Brain Injury; Subconcussive, Head Trauma,  
44  
45 Trauma, Children; Pediatric; Glial fibrillary acidic protein (GFAP), Ubiquitin C-terminal  
46  
47 hydrolase (UCH-L1); Blood test  
48  
49  
50  
51  
52  
53  
54  
55  
56  
57  
58  
59  
60

## INTRODUCTION

Glial Fibrillary Acidic Protein (GFAP) and Ubiquitin C-terminal hydrolase (UCH-L1) have been evaluated in several studies to determine the need for CT scan and neurosurgical intervention in mild to moderate TBI patients (mmTBI) in adults<sup>1-7</sup> and more recently in children with mmTBI.<sup>8-10</sup> In early 2018, GFAP and UCH-L1 were FDA-approved for clinical use in adult patients with mmTBI to help determine need for CT scan within 12 hours of injury.<sup>11</sup> The approval was based on the ability to find lesions on CT scan but was not approved to diagnose a concussion or a mild TBI. Moreover, it was not approved for use in children.

Following trauma, patients often have a constellation of injuries and it is important that TBI biomarkers indicate brain-specific injury in order to be clinically useful. A number of articles have described how GFAP and UCH-L1 were able to distinguish mmTBI patients from orthopedic controls and motor vehicle crash controls as well as in those TBI patients with negative CT's.<sup>1, 3, 4</sup> In these studies, many trauma control patients were exposed to significant trauma including the acceleration-deceleration vectors of MVCs and substantial falls and both GFAP and UCH-L1 showed a graded response to severity of injury from normal controls to trauma controls, to mild and moderate TBI. Moreover, GFAP has consistently shown very good specificity to brain injury in cases of polytrauma.<sup>3, 12</sup> GFAP has demonstrated the ability to detect intracranial lesions in victims of multiple trauma with mild TBI who had substantial extracranial injuries and fractures.<sup>3</sup>

Importantly, there is a group of individuals with head trauma who have been significantly understudied, and in whom biomarkers are rarely, if at all, examined. These

1  
2  
3 are people who experience head trauma without symptoms of concussion. They may be  
4  
5 classified as having “no injury” or they may represent milder forms of concussion that do  
6  
7 not elicit the typical signs or symptoms associated with concussion and are referred to as  
8  
9 subconcussive injuries. To date, there is a paucity of studies addressing the effects of  
10  
11 subconcussive head impacts following head trauma. The issue of subconcussive trauma  
12  
13 has been a particular concern in military personnel<sup>13</sup> and in athletes, as repetitive  
14  
15 subconcussive impacts have the potential for long-term deleterious effects.<sup>14-16</sup> Therefore,  
16  
17 studying these biomarkers in patients with head trauma without symptoms could provide  
18  
19 unique insights into how neuronal and glial biomarkers behave in subconcussive  
20  
21 trauma.<sup>17</sup>  
22  
23  
24  
25

26  
27 There is insufficient data on the diagnostic accuracy of GFAP and UCH-L1 in  
28  
29 children and adults in determining which trauma patients with normal mental status have  
30  
31 a concussion and how well they perform over time following different degrees of mild  
32  
33 head trauma. This study evaluated the diagnostic accuracy of serum glial and neuronal  
34  
35 serum biomarkers GFAP and UCH-L1, both individually and in combination, in  
36  
37 detecting the presence of a concussion and grading potential subconcussive and  
38  
39 nonconcussive brain injury in pediatric and adult trauma patients presenting to the  
40  
41 emergency department with a normal mental status (GCS score of 15). Gradients of brain  
42  
43 injury were defined by comparing serum biomarker concentrations in three groups of  
44  
45 patients: 1) those with concussion; 2) those with blunt head trauma without overt signs or  
46  
47 symptoms of concussion (head trauma controls); and 3) those with peripheral (body)  
48  
49 trauma without head trauma or concussion (body trauma controls). Additionally, the  
50  
51  
52  
53  
54  
55  
56  
57  
58  
59  
60

1  
2  
3 temporal profile of GFAP and UCH-L1 were measured over seven days in these three  
4  
5 groups in adults.  
6  
7  
8  
9

## 10 **METHODS**

### 11 *Study Population*

12  
13  
14 This prospective cohort study enrolled a convenience sample of adult and pediatric  
15  
16 trauma patients presenting to the emergency departments of three Level I Trauma  
17  
18 Centers: a Pediatric Level 1 Trauma Center in Philadelphia, Pennsylvania, a Pediatric  
19  
20 Level 1 Trauma Center in Orlando, Florida, and an affiliated Adult Level 1 trauma center  
21  
22 in Orlando, Florida. This study was approved by the respective Institutional Review  
23  
24 Boards (IRB) of each institution. Informed consent was obtained from patients and/or  
25  
26 their legal authorized representatives prior to enrollment and assent was obtained for  
27  
28 children between the ages of 7 to 18 years.  
29  
30  
31  
32  
33  
34  
35  
36

37 Eligibility for concussion patients was determined by the treating physician based  
38  
39 on the history of blunt head trauma followed by either loss of consciousness, amnesia, or  
40  
41 disorientation (or change in behavior in children) and presenting to the emergency  
42  
43 department within 4 hours of injury with a Glasgow Coma Scale (GCS) Score of 15.  
44  
45 Eligibility was also prospectively verified by the research team prior to enrollment. Head  
46  
47 CT Scans were performed at the discretion of the treating physician. Patients were  
48  
49 excluded if they: 1) had no history of trauma as their primary event (e.g. syncope or  
50  
51 seizure); 2) had known dementia, chronic psychosis or active CNS pathology; 3) were  
52  
53 pregnant; or 4) were incarcerated or 5) had hemodynamic instability.  
54  
55  
56  
57  
58  
59  
60

Both nonconcussive trauma groups, the body trauma control patients (no head trauma and no concussion) and the head trauma control patients (head trauma and no concussion) had a GCS score of 15 presenting to the emergency department with a traumatic mechanism of injury but without concussion. They experienced similar mechanisms of injury as the concussion group and all had a normal mental status since injury (as verified by the research team prospectively by at least two different sources) and had no evidence of acute brain injury or hemodynamic instability. Peripheral (body) trauma controls were primarily composed of orthopedic and soft tissue injuries. These patients were carefully screened to ensure they had no loss of consciousness, no amnesia and no alteration in sensorium at any time after injury. The purpose of enrolling nonconcussive body trauma controls and nonconcussive head trauma controls was to have appropriate comparison groups to compare the accuracy of the biomarkers in detecting concussion and simulate the real world challenges faced by clinicians. The head trauma controls provided an opportunity to assess biomarker release in the setting of head trauma without symptoms and the potential for subconcussive brain injury.

### *Study Procedures*

All initial patient assessments were made by board certified adult and pediatric emergency medicine physicians trained by a formal one-hour session on evaluating patient eligibility for the study. Following the initial screening, a meticulous secondary assessment was conducted by the research team. All prehospital and emergency department records were reviewed, patients, families and witnesses (if available) were carefully questioned and the final determination was made by the emergency physician together with the research team. Patient classification was performed prospectively.

1  
2  
3 Blood samples were obtained within 4 hours of time of injury. Repeated blood sampling  
4  
5 was conducted for as long as the patient remained in hospital at 4, 8, 12, 16, 24, 36, 48,  
6  
7 60, 72, 84, 96, 108, 120, 132, 144, 156, 168 and 180 hours after injury and discontinued  
8  
9 when discharged. Patient management was not altered by the study. For each blood draw  
10  
11 a single vial of approximately 5mL of blood was collected and placed in a serum  
12  
13 separator tube and allowed to clot at room temperature. The blood was centrifuged within  
14  
15 30 minutes and the serum was placed in bar-coded aliquot containers and stored in a  
16  
17 freezer at -70 degrees Celsius until it was transported to a central laboratory (Banyan  
18  
19 Biomarkers Inc, Alachua Florida USA). There, the samples were analyzed in batches  
20  
21 using sandwich enzyme-linked immunosorbent assays (ELISA) to GFAP and UCH-L1.  
22  
23 Lab personnel running the samples were blinded to the clinical data.  
24  
25  
26  
27

### 28 *Outcome measures*

29  
30 Performance of GFAP and UCH-L1 was evaluated within 4 hours of injury in  
31  
32 both adults and children and over a 7-day period in hospitalized adults. The main  
33  
34 outcome measures included the performance of the biomarkers in: 1) detecting the  
35  
36 presence of concussion compared to trauma patients without concussion in children and  
37  
38 adults (separately and as a whole); 2) assessing gradients of injury defined by comparing  
39  
40 three groups of patients a) those with concussion, b) those with head trauma without  
41  
42 overt signs of concussion (nonconcussive head trauma controls), and c) those with  
43  
44 peripheral (body) trauma without head trauma or concussion (nonconcussive body trauma  
45  
46 controls); 3) determining the time course of GFAP and UCH-L1 over 7 days after injury  
47  
48 in these three groups in adults.  
49  
50  
51  
52

### 53 *Statistical Analysis*

1  
2  
3 Descriptive statistics with means medians and proportions were used to describe  
4 the data. For statistical analysis, biomarker levels were treated as continuous data,  
5 measured in ng/ml and expressed as medians with interquartile range. Data were assessed  
6 for equality of variance and distribution. Logarithmic transformations were conducted on  
7 non-normally distributed data. Group comparisons for different trauma groups were  
8 performed using analysis of variance with multiple comparisons using Games-Howell  
9 post-hoc test. Receiver Operating Characteristics (ROC) curves were created to explore  
10 the ability of the biomarkers to identify the presence of a concussion. Estimates of the  
11 area under these curves (AUC) were obtained (AUC=0.5 indicates no discrimination and  
12 an AUC=1.0 indicates a perfect diagnostic test).

13  
14  
15  
16  
17  
18  
19  
20  
21  
22  
23  
24  
25  
26  
27 A power analysis yielded a sample of 281 cases of concussion and 141 cases  
28 without concussion achieves an 80% power to detect a difference of 0.06 between the  
29 area under the ROC curve (AUC) under the null hypothesis of 0.81 and an AUC under  
30 the alternative hypothesis of 0.75 using a two-sided z-test at a significance level of 0.05.  
31 All analyses were performed using the statistical software package SPSS 22.0 (IBM  
32 Corporation®, Somers NY).

### 33 34 35 36 37 38 39 40 41 *Biomarker Analysis*

42  
43 Serum GFAP and UCH-L1 levels were measured in duplicate for each sample  
44 using a validated ELISA platform (Banyan Biomarkers Inc., Alachua Florida USA). For  
45 the GFAP assay, the lower limit of quantification (LLOQ) is 0.030ng/ml and upper limit  
46 of quantification (ULOQ) is 50ng/ml. The limit of detection (LoD) is 0.008ng/mL. For  
47 the UCH-L1 assay, the lower limit of quantification (LLOQ) is 0.100ng/ml and upper  
48 limit of quantification (ULOQ) is 9ng/ml. The limit of detection (LoD) is 0.045ng/mL.

1  
2  
3 Any samples yielding a signal over the quantification or calibrator range were diluted and  
4  
5 re-assayed.  
6

7  
8 Patients and the public were not involved in the design, recruitment or conduct of  
9  
10 the study.  
11

## 12 13 14 **RESULTS**

15  
16  
17 Over the study period, 3462 pediatric and adult trauma patients were screened,  
18  
19 1385 met eligibility criteria, 751 with a GCS score of 15 were enrolled and 712 had  
20  
21 biomarker data available for analysis (Figure 1). Of those enrolled, 371 (52%) had a  
22  
23 concussion, 149 (21%) had nonconcussive head trauma (head trauma controls), and 192  
24  
25 (27%) had nonconcussive body trauma without head trauma (body trauma controls). The  
26  
27 flow diagram in Figure 1 describes the distribution of enrolled patients. There were 176  
28  
29 (25%) children and 537 (75%) adults. The distribution of clinical characteristics of all  
30  
31 enrolled patients is presented in Table 1. The injury severity score was consistent across  
32  
33 groups with median scores of 4.  
34  
35  
36  
37

38  
39 There were a total of 1904 samples drawn in 712 patients. Patients had serum  
40  
41 samples drawn within 4 hours of injury (16 children had samples drawn between 4 and 8  
42  
43 hours) with the average time from injury to serum sample collection of 3.1 hours (SD  
44  
45 0.9). Seven hundred and twelve patients had initial samples drawn at enrollment, 567  
46  
47 patients had samples at 4-hours post-injury, 109 at 8-hours post-injury, 80 at 12 hours  
48  
49 post-injury, 73 at 16-hours post-injury; 70 at 20-hours post-injury, 67 at 24-hours post-  
50  
51 injury, 46 at 36-hours post-injury, 40 at 48-hours post-injury, 33 at 60-hours post-injury,  
52  
53 32 at 72-hours post-injury, 20 at 84-hours post-injury, 17 at 96-hours post-injury, 8 at  
54  
55  
56  
57  
58  
59  
60



1  
2  
3 108-hours post-injury, 8 at 120-hours post-injury, 4 at 132-hours post-injury, 6 at 144-  
4  
5 hours post-injury, 6 at 156-hours post-injury, and 5 at 168-hours post-injury.  
6  
7

8           Among body trauma control patients, 229 (60%) samples were below the LLOD  
9  
10 and 90 (24%) below the LLOQ for GFAP. In head trauma control patients 144 (38%)  
11  
12 samples were below the LLOD and 88 (24%) below the LLOQ for GFAP. In concussion  
13  
14 patients, 276 (24%) samples were below the LLOD and 172 (15%) below the LLOQ for  
15  
16 GFAP. Among body trauma control patients, 61 (16%) samples were below the LLOD  
17  
18 and 70 (19%) below the LLOQ for UCH-L1. In head trauma control patients 34 (9%)  
19  
20 samples were below the LLOD and 39 (10%) below the LLOQ for UCH-L1. In  
21  
22 concussion patients, 128 (11%) samples were below the LLOD and 103 (11%) below the  
23  
24 LLOQ for UCH-L1.  
25  
26  
27

28  
29           The time course of GFAP and UCH-L1 over a week post trauma is depicted in  
30  
31 Figure 2 and contrasted in three groups of patients (concussion, head trauma controls, and  
32  
33 body trauma controls). In the concussion patients the serum concentration of GFAP was  
34  
35 detectable within 1 hour of injury and reached a peak at 20 hours post-injury and  
36  
37 decreased over 72 hours. GFAP concentrations exhibited a slower decline thereafter, but  
38  
39 were still detectable at 168 hours (7 days) post-injury. In contrast, UCH-L1 rose very  
40  
41 rapidly after injury, reached a peak at 8 hours, decreased quickly to 12 hours and was  
42  
43 followed by a slower decline to 60 hours post-injury. Subsequently, UCH-L1, like GFAP,  
44  
45 exhibited some smaller peaks and troughs over 7 days and was also detectable at 168  
46  
47 hours post-injury.  
48  
49  
50

51  
52  
53           In head trauma controls GFAP levels were remarkably lower than in the  
54  
55 concussion patients with very slight elevations until 48 hours. The peak appeared at 20  
56  
57  
58  
59

1  
2  
3 hours (as in the concussion patients) and after 48 hours GFAP levels remained almost  
4 undetectable. Interestingly, in head trauma controls UCH-L1 levels peaked within 4  
5  
6 undetectable. Interestingly, in head trauma controls UCH-L1 levels peaked within 4  
7  
8 hours and remained lower than concussion patients over 12 hours. Thereafter, UCH-L1  
9  
10 concentrations become quite variable with levels either slightly lower, at par, or slightly  
11  
12 higher than concussion patients.  
13

14  
15 In body trauma control patients, concentrations of GFAP were negligible over  
16  
17 time without any appreciable elevations. Initial UCH-L1 levels were slightly elevated but  
18  
19 significantly lower than either head trauma or concussion patients. UCH-L1 levels  
20  
21 decreased quickly over 12 hours (as it did in the head trauma controls) and levels  
22  
23 remained noticeably elevated over the next several days.  
24  
25

26  
27 The ability of GFAP and UCH-L1, individually and in combination, to distinguish  
28  
29 concussion patients from body trauma controls (Table 2) and head trauma controls (Table  
30  
31 3) over time was assessed by calculating the area under the ROC Curve (AUC) at each  
32  
33 time-point post-injury . A comparison between concussion and both trauma and head  
34  
35 trauma controls can be found in Table 4. When comparing concussion patients to body  
36  
37 trauma controls, GFAP demonstrated a range of AUC's between 0.75 (0.39-1.00) to 0.89  
38  
39 (0.69-1.00) and UCH-L1 demonstrated AUC's between 0.50 (0.05-0.23) to 0.78 (0.56-  
40  
41 1.00). When GFAP and UCH-L1 were combined, the AUC ranged from 0.75 (0.49-1.00)  
42  
43 to 0.90 (0.76-1.00) and closely mimicked the pattern of GFAP. GFAP out-performed  
44  
45 UCH-L1 at all time-points. The combination of GFAP and UCH-L1 marginally out-  
46  
47 performed GFAP alone at some time-points, however, the differences were not  
48  
49 statistically significant.  
50  
51  
52  
53  
54  
55  
56  
57  
58  
59  
60

1  
2  
3 When comparing concussion patients to head trauma controls, GFAP  
4  
5 demonstrated a range of AUC's between 0.62 (0.57-0.68) and 0.86 (0.73-1.00) and UCH-  
6  
7 L1 demonstrated AUC's between 0.13 (0-1.00) to 0.61 (0.49-0.73). When GFAP and  
8  
9 UCH-L1 were combined, the AUC ranged from 0.33 (0-0.71) to 0.86 (0.73-1.00). GFAP  
10  
11 out-performed UCH-L1 at all time-points and out-performed the combination of the two  
12  
13 biomarkers at all time-points.  
14  
15

16  
17 A comparison of the performance of GFAP and UCH-L1 measured within 4 hours  
18  
19 of injury in children and adults is shown in Figure 3. There are incremental increases in  
20  
21 levels of GFAP and UCH-L1 from nonconcussive body trauma controls to nonconcussive  
22  
23 head trauma controls to patients with concussion. In concussion patients, GFAP  
24  
25 concentrations were significantly higher compared to body trauma controls ( $p < 0.001$ ) and  
26  
27 to head trauma controls ( $p < 0.001$ ) in both children and adults, after controlling for  
28  
29 multiple comparisons. There were also significantly higher levels of GFAP in head  
30  
31 trauma controls compared to body trauma controls in children ( $p < 0.001$ ) and adults  
32  
33 ( $p < 0.001$ ). In adults, concentrations of UCH-L1 measured within 4 hours of injury were  
34  
35 also significantly higher in concussion patients than body trauma controls ( $p < 0.001$ ) and  
36  
37 head trauma controls ( $p = 0.002$ ). There were also significantly higher levels of UCH-L1 in  
38  
39 head trauma controls compared to body trauma controls ( $P = 0.017$ ). Similarly, in children,  
40  
41 concentrations of UCH-L1 were significantly higher in concussion patients than body  
42  
43 trauma controls ( $p = 0.045$ ). However, there were no significant differences between  
44  
45 concussion patients and head trauma controls ( $p = 0.894$ ) and between body trauma and  
46  
47 head trauma controls in children.  
48  
49  
50  
51  
52  
53  
54  
55  
56  
57  
58  
59  
60

1  
2  
3 When ROC Curves were compared in children and adults, the AUC's  
4  
5 demonstrated that initial GFAP levels were able to distinguish concussion patients from  
6  
7 body trauma controls with an AUC of 0.80 (0.73-0.87) in children and 0.76 (0.71-0.80) in  
8  
9 adults (Table 2). In contrast, initial UCH-L1 levels distinguished concussion from body  
10  
11 trauma controls with a significantly lower AUC of 0.62 (0.53-0.72) in children (p=0.003)  
12  
13 and 0.69 (0.64-0.74) in adults (p=0.04) (Table 2). The AUC's for GFAP for  
14  
15 distinguishing concussion patients from head trauma controls was 0.64 (0.54-0.73) in  
16  
17 children and 0.66 (0.61-0.71) in adults. AUC's were lower for UCH-L1 with an AUC of  
18  
19 0.54 (0.43-0.66) in children (p=0.23) and 0.58 (0.51-0.64) in adults (p=0.04) (Table 3).  
20  
21 Overall, when concussion was compared to all (head and body) trauma control cases  
22  
23 without concussion, the AUC for GFAP was 0.73 (0.66-0.81) in children and 0.71 (0.67-  
24  
25 0.76) in adults. AUC's were significantly lower for UCH-L1 with an AUC of 0.59 (0.51-  
26  
27 0.67) in children (p=0.013) and 0.64 (0.59-0.69) in adults (p=0.030)(Table 4).  
28  
29 Additionally, we excluded the 35 (11%) patients with intracranial lesions on CT scan and  
30  
31 found similar results (Figure 4).  
32  
33  
34  
35  
36  
37  
38  
39

## 40 **DISCUSSION**

41  
42 This prospective study assessed the diagnostic accuracy of glial and neuronal  
43  
44 biomarkers, GFAP and UCH-L1, for detecting concussion in a very large cohort of  
45  
46 children and adult trauma patients presenting to three Level I trauma centers. The study  
47  
48 investigated the pattern of biomarker release in trauma patients with and without  
49  
50 concussion at twenty distinct time-points, making it is among the first and largest studies  
51  
52 to assess the temporal profile of these two biomarkers in three groups of trauma patients  
53  
54  
55  
56  
57  
58  
59  
60

1  
2  
3 with a normal mental status. In both children and adults, GFAP and UCH-L1  
4  
5 concentrations increased incrementally from those with nonconcussive body trauma to  
6  
7 those with nonconcussive head trauma with highest levels in patients with concussion.  
8  
9 GFAP showed very distinct patterns of release in all three groups, whereas UCH-L1  
10  
11 demonstrated similar patterns of release in all three groups but at much higher  
12  
13 concentrations in both nonconcussive trauma groups. There were significant differences  
14  
15 between the three groups controlling for multiple comparisons for both biomarkers in  
16  
17 adults, however, UCH-L1 could not distinguish concussive from nonconcussive head  
18  
19 trauma in children.  
20  
21  
22

23  
24 When the time course of GFAP and UCH-L1 was contrasted in three groups of  
25  
26 patients (concussion, head trauma controls, and body trauma controls), GFAP showed a  
27  
28 clear increase over the first 20 hours post-injury and decline from 20 to 72 hours in  
29  
30 concussion patients and was still detectable at 7 days post-injury making it potentially  
31  
32 useful over a week from injury. Although GFAP was mildly elevated in head trauma  
33  
34 without concussion, the expression was very low and very early compared to concussion.  
35  
36 In body trauma control patients, concentrations of GFAP were negligible over all time  
37  
38 points suggesting very good specificity for concussion. These results are consistent with  
39  
40 previous studies showing how robust it is in multiple trauma.<sup>3,4</sup> In contrast, UCH-L1 rose  
41  
42 more rapidly after concussion than GFAP, peaking within 8 hours and steadily decreasing  
43  
44 from 12 to 60 hours. Unexpectedly, UCH-L1 was much higher in the head trauma control  
45  
46 group compared to GFAP at all time-points from injury over seven days. Even more  
47  
48 surprising, was that UCH-L1 was elevated in body trauma too and showed a similar  
49  
50 pattern of release as head trauma control patients. Possible explanations for UCH-L1  
51  
52  
53  
54  
55  
56  
57  
58  
59  
60

1  
2  
3 elevations in control patients include that 1) UCH-L1 may not be completely brain  
4 specific and is released from other organ or tissue trauma, or 2) UCH-L1 is an  
5  
6 ultrasensitive marker of any neuronal disruption that may occur from impacts to the body  
7  
8 that jostle the brain.  
9  
10

11  
12 Given that GFAP appears to be so brain specific and that it also showed low level  
13 elevations in the first 48 hours following head trauma without concussion symptoms  
14 (head trauma controls), these elevations may represent milder forms of concussion that  
15 do not elicit typical signs or symptoms associated with concussion. These injuries may be  
16 irrelevant or they may represent important trauma that is just below the level of clinical  
17 detection and referred to as subconcussive trauma. To date, there is a paucity of studies  
18 addressing the effects of subconcussive head impacts following head trauma. Studies in  
19 athletes have documented that both clinically diagnosed concussion and subconcussive  
20 traumas can induce similar changes in brain structure and functions on brain imaging.<sup>18, 19</sup>  
21 These changes include alterations in white matter and cerebrovascular integrity, blood  
22 flow, brain activation during working memory tasks, resting-state functional connectivity,  
23 and brain chemistry as measured by various forms of magnetic resonance imaging  
24 (MRI).<sup>18, 20, 21</sup> The effect of thousands of subconcussive impacts has the potential for  
25 long-term deleterious effects on brain function and neurodegeneration in select  
26 individuals.<sup>14, 15</sup> In athletes UCH-L1 has shown elevations in both concussive<sup>22</sup> and  
27 subconcussive trauma.<sup>23</sup>  
28  
29  
30  
31  
32  
33  
34  
35  
36  
37  
38  
39  
40  
41  
42  
43  
44  
45  
46  
47  
48

49 Concussion is a clinical diagnosis that could benefit from a relatively noninvasive  
50 complementary tool such as a blood test.<sup>8, 9, 24-26</sup> Based on these results, the potential  
51 utility of GFAP to distinguish concussion from body trauma controls over 7 days post-  
52  
53  
54  
55  
56  
57  
58  
59  
60

1  
2  
3 injury was fair to excellent with AUC's of 0.75 to 0.89, and UCH-L1's ability was  
4  
5 guarded and variable with AUC's from poor to good depending on timing of samples  
6  
7 (AUC's of 0.54 to 0.78) with earlier samples being better. The combination of the both  
8  
9 biomarkers did not significantly improve concussion detection among trauma control  
10  
11 patients. The distinction between head trauma patients with and without concussion was  
12  
13 not as robust as with body trauma controls. GFAP performed with fair to very good  
14  
15 AUC's (0.62 to 0.86) over the week post-injury, with optimal performance between 24 to  
16  
17 96 hours. The ability of UCH-L1 to distinguish concussion from head trauma control  
18  
19 patients was very poor with AUC's of 0.13 -0.61 and did not contribute to or improve the  
20  
21 performance of GFAP alone.  
22  
23  
24  
25

26  
27 Since it is not uncommon for patients who have suffered a concussion or mild  
28  
29 TBI not to seek immediate medical attention, understanding when to use the biomarkers  
30  
31 for detection of injury is critical. In the context of developing a point-of-care test, UCH-  
32  
33 L1's early and rapid rise could be useful in the early post injury setting such as in the  
34  
35 ambulance, on the playing field or on the battle field. The longer half-life of GFAP  
36  
37 makes it a very favorable marker to use in both the acute and subacute phases of injury as  
38  
39 it is able to detect concussion for up to 7 days after injury.  
40  
41  
42

43  
44 The authors recognize that there are limitations to this study. This study addressed  
45  
46 diagnosis of concussion in the acute care setting and did not describe long-term outcome  
47  
48 in these patients. The main outcomes used in this study reflect current standards of  
49  
50 practice and accepted definitions of concussion. However, future studies to better define  
51  
52 the severity of concussion and mild TBI need to be pursued, particularly when  
53  
54 neuroimaging is negative. Accordingly, we performed an analyses of patients with  
55  
56  
57  
58  
59  
60

1  
2  
3 negative neuroimaging acutely and found no significant differences in the results whether  
4 we included those with positive scans or not. The number of samples available for  
5 analysis decreased over the course of the study. This reflects the challenge of obtaining  
6 samples over time in patients with less severe injuries because they are not hospitalized  
7 as long. However, there were a large number of patients without TBI and patients with  
8 mild TBI who were captured in our longitudinal sample because they were admitted for  
9 other injuries. Important next steps will be to capture samples within minutes of injury.  
10 Uninjured controls were not included in this analysis as the concentrations of these two  
11 biomarkers have already been well characterized in uninjured normal control patients.<sup>1, 2</sup>  
12  
13  
14  
15  
16  
17  
18  
19  
20  
21  
22  
23  
24  
25

## 26 **CONCLUSION**

27  
28  
29 In a cohort of trauma patients with normal mental status, GFAP out-performed UCH-L1  
30 in detecting concussion in both children and adults. Blood levels of GFAP and UCH-L1  
31 showed incremental elevations across three injury groups, from nonconcussive body  
32 trauma, to nonconcussive head trauma, to concussion. However, UCH-L1 was expressed  
33 at much higher levels than GFAP in those with nonconcussive trauma, particularly in  
34 children, suggesting that UCH-L1 is either not completely brain specific or ultrasensitive  
35 to subtle impacts. Each biomarker exhibited a distinct temporal profile in each trauma  
36 group over seven days with earlier elevations in UCH-L1 and more consistent and  
37 sustained elevations in GFAP. Furthermore, elevations in both biomarkers in patients  
38 with nonconcussive head trauma may be reflective of a subconcussive brain injury. The  
39 stage is set for future studies to verify these findings.  
40  
41  
42  
43  
44  
45  
46  
47  
48  
49  
50  
51  
52  
53  
54  
55  
56  
57  
58  
59  
60



1  
2  
3  
4  
5  
6  
7  
8  
9  
10  
11  
12  
13  
14  
15  
16  
17  
18  
19  
20  
21  
22  
23  
24  
25  
26  
27  
28  
29  
30  
31  
32  
33  
34  
35  
36  
37  
38  
39  
40  
41  
42  
43  
44  
45  
46  
47  
48  
49  
50  
51  
52  
53  
54  
55  
56  
57  
58  
59  
60

Confidential: For Review Only

## KEY MESSAGES

### **What is already known on this topic**

In 2018 serum biomarkers Glial Fibrillary Acidic Protein (GFAP) and Ubiquitin C-terminal hydrolase (UCH-L1) were FDA-approved in adults to guide CT scan ordering in mild to moderate traumatic brain injury. However, their ability to detect concussion in either children or adults has not been determined and there currently exists no objective measure to diagnose concussion acutely after injury. The challenge for clinicians is to detect concussion in the setting of head and/or peripheral trauma when patients have a normal mental status. Having an objective measure of concussion would be very helpful in managing trauma patients.

### **What this study adds**

GFAP out-performed UCH-L1 in detecting concussion in both children and adults within 4 hours of injury. Blood levels of GFAP and UCH-L1 showed incremental elevations across three injury groups, from nonconcussive body trauma, to nonconcussive head trauma, to concussion. UCH-L1 was expressed at much higher levels than GFAP in those with nonconcussive trauma, particularly in children, suggesting that UCH-L1 is either not completely brain specific or ultrasensitive to subtle impacts. Elevations of these biomarkers in nonconcussive head trauma suggests possible subconcussive brain injury. GFAP could be potentially useful to detect concussion for up to a week post-injury.

## ACKNOWLEDGEMENT

**Contributors:** LP had full access to the data in the study and takes responsibility for the integrity of the data and the accuracy of the data analysis. LP conceived and designed the study. Data was acquired by LP, JR, PG, CFB, CNT, NJA, MAL, CAH, DMG, MRZ, and MM. All authors were involved in the analysis and interpretation of the data. LP drafted the manuscript and all authors were involved in critical revision of the manuscript for important intellectual content. Statistical analysis was conducted by LP. Funding was obtained by LP. Administrative, technical, or material support was provided by LP, PG, MRZ, and MM. The study was supervised by LP, JR, PG, CFB, CNT, NJA, MAL, CAH, DMG, MRZ, and MM. The corresponding author attests that all listed authors meet authorship criteria and that no others meeting the criteria have been omitted.

**Funding:** This study was supported by Award Number R01NS057676 (Papa, PI) from the National Institute of Neurological Disorders and Stroke. The content is solely the responsibility of the authors and does not necessarily represent the official views of the National Institute of Neurological Disorders And Stroke or the National Institutes of Health. The funder had no role in the design and conduct of the study; collection, management, analysis, and interpretation of the data; preparation, review, or approval of the manuscript; and decision to submit the manuscript for publication.

**Competing Interests:** Dr. Papa is an unpaid scientific consultant for Banyan Biomarkers, Inc. but receives no stocks or royalties from the company and will not benefit financially from this publication. No other disclosures are reported. Drs. Welch and Lewis receive contract research funding from Banyan Biomarkers Inc. They do not receive stocks or royalties from the company and will not benefit financially from this publication.

**Ethical Approval:** This study was approved by the respective Institutional Review Boards (IRB) of each institution (Orlando Regional Medical Center Institutional Review Board, Arnold Palmer Hospital for Children Institutional Review Board and Children's Hospital of Philadelphia Institutional Review Board).

**Data sharing:** Data are not available for sharing at this time.

**Transparency:** The lead author (LP) affirms that this manuscript is an honest, accurate, and transparent account of the study being reported; that no important aspects of the study have been omitted; and that any discrepancies from the study as planned (and, if relevant, registered) have been explained.

**Dissemination declaration:** Dissemination of results to participants is not possible/applicable.

**REFERENCES**

1. Papa L, Lewis LM, Falk JL, Zhang Z, Silvestri S, Giordano P, et al. Elevated levels of serum glial fibrillary acidic protein breakdown products in mild and moderate traumatic brain injury are associated with intracranial lesions and neurosurgical intervention. *Ann Emerg Med.* 2012;59(6):471-83.
2. Papa L, Lewis LM, Silvestri S, Falk JL, Giordano P, Brophy GM, et al. Serum levels of ubiquitin C-terminal hydrolase distinguish mild traumatic brain injury from trauma controls and are elevated in mild and moderate traumatic brain injury patients with intracranial lesions and neurosurgical intervention. *J Trauma Acute Care Surg.* 2012;72(5):1335-44.
3. Papa L, Silvestri S, Brophy GM, Giordano P, Falk JL, Braga CF, et al. GFAP Out-Performs S100beta in Detecting Traumatic Intracranial Lesions on Computed Tomography in Trauma Patients with Mild Traumatic Brain Injury and Those with Extracranial Lesions. *J Neurotrauma.* 2014;31(22):1815-22.
4. Papa L, Brophy GM, Welch RD, Lewis LM, Braga CF, Tan CN, et al. Time Course and Diagnostic Accuracy of Glial and Neuronal Blood Biomarkers GFAP and UCH-L1 in a Large Cohort of Trauma Patients With and Without Mild Traumatic Brain Injury. *JAMA Neurol.* 2016;73(5):551-60.
5. Welch RD, Ellis M, Lewis LM, Ayaz SI, Mika VH, Millis S, et al. Modeling the Kinetics of Serum Glial Fibrillary Acidic Protein, Ubiquitin Carboxyl-Terminal

1  
2  
3 Hydrolase-L1, and S100B Concentrations in Patients with Traumatic Brain Injury. J  
4 Neurotrauma. 2017;34(11):1957-71.  
5  
6  
7

8  
9 6. Lewis LM, Schloemann DT, Papa L, Fucetola RP, Bazarian J, Lindburg M, et al.  
10 Utility of Serum Biomarkers in the Diagnosis and Stratification of Mild Traumatic Brain  
11 Injury. Acad Emerg Med. 2017;24(6):710-20.  
12  
13  
14  
15

16  
17 7. Bazarian JJ, Biberthaler P, Welch RD, Lewis LM, Barzo P, Bogner-Flatz V, et al.  
18 Serum GFAP and UCH-L1 for prediction of absence of intracranial injuries on head CT  
19 (ALERT-TBI): a multicentre observational study. Lancet Neurol. 2018;17(9):782-9.  
20  
21  
22  
23  
24

25  
26 8. Papa L, Zonfrillo MR, Ramirez J, Silvestri S, Giordano P, Braga CF, et al.  
27 Performance of Glial Fibrillary Acidic Protein in Detecting Traumatic Intracranial  
28 Lesions on Computed Tomography in Children and Youth With Mild Head Trauma.  
29 Acad Emerg Med. 2015;22(11):1274-82.  
30  
31  
32  
33  
34  
35

36  
37 9. Papa L, Mittal MK, Ramirez J, Ramia M, Kirby S, Silvestri S, et al. In Children  
38 and Youth with Mild and Moderate Traumatic Brain Injury, Glial Fibrillary Acidic  
39 Protein Out-Performs S100beta in Detecting Traumatic Intracranial Lesions on  
40 Computed Tomography. J Neurotrauma. 2016;33(1):58-64.  
41  
42  
43  
44  
45  
46

47  
48 10. Papa L, Mittal MK, Ramirez J, Silvestri S, Giordano P, Braga CF, et al. Neuronal  
49 Biomarker Ubiquitin C-Terminal Hydrolase Detects Traumatic Intracranial Lesions on  
50 Computed Tomography in Children and Youth with Mild Traumatic Brain Injury. J  
51 Neurotrauma. 2017;34(13):2132-40.  
52  
53  
54  
55  
56  
57  
58  
59  
60

- 1  
2  
3 11. FDA authorizes marketing of first blood test to aid in the evaluation of concussion  
4 in adults. Silver Springs: US Food & Drug Administration; 2018  
5  
6 [https://www.fda.gov/NewsEvents/Newsroom/PressAnnouncements/ucm596531.htm].  
7  
8  
9
- 10  
11 12. Pelinka LE, Kroepfl A, Schmidhammer R, Krenn M, Buchinger W, Redl H, et al.  
12 Glial fibrillary acidic protein in serum after traumatic brain injury and multiple trauma. *J*  
13 *Trauma*. 2004;57(5):1006-12.  
14  
15  
16  
17
- 18  
19 13. Tate CM, Wang KK, Eonta S, Zhang Y, Carr W, Tortella FC, et al. Serum brain  
20 biomarker level, neurocognitive performance, and self-reported symptom changes in  
21 soldiers repeatedly exposed to low-level blast: a breacher pilot study. *J Neurotrauma*.  
22 2013;30(19):1620-30.  
23  
24  
25  
26  
27
- 28  
29 14. Gavett BE, Stern RA, McKee AC. Chronic traumatic encephalopathy: a potential  
30 late effect of sport-related concussive and subconcussive head trauma. *Clin Sports Med*.  
31 2011;30(1):179-88, xi.  
32  
33  
34  
35  
36  
37
- 38  
39 15. Bailes JE, Dashnaw ML, Petraglia AL, Turner RC. Cumulative effects of  
40 repetitive mild traumatic brain injury. *Prog Neurol Surg*. 2014;28:50-62.  
41  
42  
43  
44
- 45 16. Huber BR, Alosco ML, Stein TD, McKee AC. Potential Long-Term  
46 Consequences of Concussive and Subconcussive Injury. *Phys Med Rehabil Clin N Am*.  
47 2016;27(2):503-11.  
48  
49  
50  
51
- 52  
53 17. Papa L, Wang KKW. Raising the Bar for Traumatic Brain Injury Biomarker  
54 Research: Methods Make a Difference. *J Neurotrauma*. 2017;34(13):2187-9.  
55  
56  
57  
58  
59

- 1  
2  
3 18. Slobounov SM, Walter A, Breiter HC, Zhu DC, Bai X, Bream T, et al. The effect  
4 of repetitive subconcussive collisions on brain integrity in collegiate football players over  
5 a single football season: A multi-modal neuroimaging study. *Neuroimage Clin.*  
6  
7  
8 2017;14:708-18.  
9  
10  
11  
12  
13 19. Reynolds BB, Stanton AN, Soldozy S, Goodkin HP, Wintermark M, Druzgal TJ.  
14 Investigating the effects of subconcussion on functional connectivity using mass-  
15 univariate and multivariate approaches. *Brain Imaging Behav.* 2017.  
16  
17  
18  
19  
20  
21  
22 20. Johnson B, Neuberger T, Gay M, Hallett M, Slobounov S. Effects of  
23 subconcussive head trauma on the default mode network of the brain. *J Neurotrauma.*  
24  
25 2014;31(23):1907-13.  
26  
27  
28  
29  
30  
31 21. Bahrami N, Sharma D, Rosenthal S, Davenport EM, Urban JE, Wagner B, et al.  
32 Subconcussive Head Impact Exposure and White Matter Tract Changes over a Single  
33 Season of Youth Football. *Radiology.* 2016;281(3):919-26.  
34  
35  
36  
37  
38  
39 22. Meier TB, Nelson LD, Huber DL, Bazarian JJ, Hayes RL, McCrea MA.  
40 Prospective Assessment of Acute Blood Markers of Brain Injury in Sport-Related  
41 Concussion. *J Neurotrauma.* 2017;34(22):3134-42.  
42  
43  
44  
45  
46  
47 23. Joseph JR, Swallow JS, Willsey K, Lapointe AP, Khalatbari S, Korley FK, et al.  
48 Elevated markers of brain injury as a result of clinically asymptomatic high-acceleration  
49 head impacts in high-school football athletes. *J Neurosurg.* 2018:1-7.  
50  
51  
52  
53  
54  
55  
56  
57  
58  
59  
60

1  
2  
3 24. Papa L. Potential Blood-based Biomarkers for Concussion. *Sports Med Arthrosc.*  
4  
5 2016;24(3):108-15.  
6

7  
8  
9 25. Papa L, Ramia MM, Kelly JM, Burks SS, Pawlowicz A, Berger RP. Systematic  
10 review of clinical research on biomarkers for pediatric traumatic brain injury. *J*  
11  
12 *Neurotrauma.* 2013;30(5):324-38.  
13  
14

15  
16  
17 26. Papa L, Ramia MM, Edwards D, Johnson BD, Slobounov SM. Systematic review  
18 of clinical studies examining biomarkers of brain injury in athletes after sports-related  
19  
20 concussion. *J Neurotrauma.* 2015;32(10):661-73.  
21  
22  
23  
24  
25  
26  
27  
28  
29  
30  
31  
32  
33  
34  
35  
36  
37  
38  
39  
40  
41  
42  
43  
44  
45  
46  
47  
48  
49  
50  
51  
52  
53  
54  
55  
56  
57  
58  
59  
60



## FIGURE LEGEND

**Figure 1. Flow diagram of screened and enrolled patients.**

**Figure 2. Temporal Profile of GFAP and UCH-L1 in three groups of trauma patients**

**Figure 2a. Temporal Profile of GFAP and UCH-L1 in body trauma control patients.**

Means with error bars representing standard error of the mean (SEM).

**Figure 2b. Temporal Profile of GFAP and UCH-L1 in head trauma control patients.**

Means with error bars representing standard error of the mean (SEM).

**Figure 2c. Temporal Profile of GFAP and UCH-L1 in trauma patients with**

**concussion.** Temporal Profile of GFAP and UCH-L1 in trauma patients with concussion.

Means with error bars representing standard error of the mean (SEM).

**Figure 3. Boxplot comparing initial levels of GFAP and UCH-L1 in three groups of trauma patients: 1) trauma controls without head trauma (controls), 2) head trauma controls without concussion (no concussion); and 3) head trauma with concussion (concussion).**

There were 47, 34, and 94 children in each group respectively and 145, 115, and 277 adults patients respectively. Medians with bars representing interquartile range (IQR).

**Figure 4. ROC Curves comparing initial levels of GFAP and UCH-L1 (individually and in combination) for predicting a concussion in trauma patients excluding patients with traumatic intracranial lesions on CT.**

## TABLES

Table 1. Characteristics of Enrolled Patients

| <i>Characteristics</i>        | <i>Trauma Patients without Head Trauma and Without Concussion (Trauma Controls)</i> | <i>Head Trauma Patients without Concussion (Head Trauma Controls)</i> | <i>Head Trauma Patients with Concussion (Concussion)</i> | <i>Total</i>  | <i>Children</i> | <i>Adults</i> |
|-------------------------------|-------------------------------------------------------------------------------------|-----------------------------------------------------------------------|----------------------------------------------------------|---------------|-----------------|---------------|
|                               | <i>N=192</i>                                                                        | <i>N=149</i>                                                          | <i>N=371</i>                                             | <i>N=712</i>  | <i>N=175</i>    | <i>N=537</i>  |
| Mean age (yrs±SD)             | 33 (±20)                                                                            | 32 (±20)                                                              | 32 (±19)                                                 | 32 (±19)      | 9 (±5)          | 40 (±16)      |
| Range                         | (0-83)                                                                              | (1-79)                                                                | (0-78)                                                   | (0-83)        | (0-17)          | (18-83)       |
| Gender (%) Male               | 115 (60)                                                                            | 91 (61)                                                               | 248 (67)                                                 | 454 (64)      | 122 (70)        | 332 (62)      |
| Race (%)                      |                                                                                     |                                                                       |                                                          |               |                 |               |
| Asian                         | 2 (1)                                                                               | 1 (1)                                                                 | 7 (2)                                                    | 10 (1)        | 2 (1)           | 8 (2)         |
| Black                         | 60 (31)                                                                             | 37 (25)                                                               | 85 (23)                                                  | 182 (26)      | 55 (31)         | 127 (24)      |
| Hispanic                      | 46 (24)                                                                             | 33 (22)                                                               | 70 (20)                                                  | 149 (21)      | 37 (21)         | 112 (21)      |
| Native American               | 3 (2)                                                                               | 0 (0)                                                                 | 0 (0)                                                    | 3 (<1)        | 0 (0)           | 3 (1)         |
| White                         | 76 (40)                                                                             | 75 (50)                                                               | 196 (53)                                                 | 347 (49)      | 76 (43)         | 271 (51)      |
| Other                         | 5 (3)                                                                               | 3 (2)                                                                 | 13 (3)                                                   | 21 (3)        | 5 (3)           | 16 (3)        |
| Mechanism of Injury (%)       |                                                                                     |                                                                       |                                                          |               |                 |               |
| Motor Vehicle Crash           | 97 (51)                                                                             | 54 (36)                                                               | 138 (37)                                                 | 289 (41)      | 8 (5)           | 281 (52)      |
| Fall                          | 53 (28)                                                                             | 29 (20)                                                               | 100 (27)                                                 | 182 (26)      | 92 (53)         | 90 (17)       |
| Motorcycle                    | 0 (0)                                                                               | 17 (11)                                                               | 29 (8)                                                   | 46 (7)        | 0 (0)           | 46 (9)        |
| Pedestrian Struck             | 5 (3)                                                                               | 4 (3)                                                                 | 18 (5)                                                   | 27 (4)        | 8 (5)           | 19 (4)        |
| Bicycle Struck by Vehicle     | 3 (2)                                                                               | 9 (6)                                                                 | 14 (4)                                                   | 26 (4)        | 5 (3)           | 21 (4)        |
| Fall off Bicycle              | 1 (1)                                                                               | 1 (1)                                                                 | 8 (2)                                                    | 10 (1)        | 4 (2)           | 6 (1)         |
| Assault                       | 0 (0)                                                                               | 6 (4)                                                                 | 15 (4)                                                   | 21 (3)        | 5 (3)           | 16 (3)        |
| Sports Injury                 | 16 (8)                                                                              | 7 (5)                                                                 | 24 (7)                                                   | 47 (7)        | 37 (21)         | 10 (2)        |
| Other Motorized Vehicle       | 0 (0)                                                                               | 5 (3)                                                                 | 5 (1)                                                    | 10 (1)        | 5 (3)           | 5 (1)         |
| Other                         | 17 (9)                                                                              | 17 (11)                                                               | 20 (5)                                                   | 54 (8)        | 11 (6)          | 43 (8)        |
| Loss of Consciousness (%)     |                                                                                     |                                                                       |                                                          |               |                 |               |
| No                            | 192 (100)                                                                           | 149 (100)                                                             | 89 (24)                                                  | 430 (60)      | 115 (66)        | 315 (59)      |
| Yes                           | 0 (0)                                                                               | 0 (0)                                                                 | 259 (70)                                                 | 259 (36)      | 37 (21)         | 222 (41)      |
| Unknown                       | 0 (0)                                                                               | 0 (0)                                                                 | 23 (6)                                                   | 23 (3)        | 23 (13)         | 0 (0)         |
| Amnesia (%)                   |                                                                                     |                                                                       |                                                          |               |                 |               |
| No                            | 192 (100)                                                                           | 149 (100)                                                             | 207 (56)                                                 | 548 (77)      | 117 (67)        | 431 (80)      |
| Yes                           | 0 (0)                                                                               | 0 (0)                                                                 | 122 (33)                                                 | 122 (17)      | 17 (10)         | 105 (20)      |
| Unknown                       | 0 (0)                                                                               | 0 (0)                                                                 | 42 (11)                                                  | 42 (6)        | 41 (23)         | 1 (<1)        |
| Injury Severity Score (n=629) |                                                                                     |                                                                       |                                                          |               |                 |               |
| Median (IQR)                  | 4.0 (1.0-4.8)                                                                       | 4.0 (1.0-6.0)                                                         | 4.0 (2.0-8.0)                                            | 4.0 (2.0-8.0) | 4.0 (1.0-5.0)   | 4.0 (2.0-8.0) |

1  
2  
3  
4  
5  
6  
7  
8  
9  
10  
11  
12  
13  
14  
15  
16  
17  
18  
19  
20  
21  
22  
23  
24  
25  
26  
27  
28  
29  
30  
31  
32  
33  
34  
35  
36  
37  
38  
39  
40  
41  
42  
43  
44  
45  
46  
47  
48  
49  
50  
51  
52  
53  
54  
55  
56  
57  
58  
59  
60

|                                |               |               |               |               |               |               |
|--------------------------------|---------------|---------------|---------------|---------------|---------------|---------------|
| Means (95%CI)                  | 4.3 (3.7-5.0) | 4.3 (3.7-4.9) | 5.8 (5.3-6.3) | 5.1 (4.7-5.5) | 4.3 (3.6-5.0) | 5.3 (4.9-5.7) |
| Admitted to Hospital (%)       | 54 (28)       | 25 (17)       | 130 (35)      | 209 (29)      | 49 (28)       | 160 (30)      |
| CT Head performed (%)          | 18 (9)        | 91 (61)       | 341 (92)      | 450 (63)      | 86 (49)       | 365 (68)      |
| Intracranial Lesions on CT (%) | 0 (0)         | 0 (0)         | 36 (11)       | 36 (8)        | 14 (17)       | 22 (6)        |

*Note: Due to rounding, percentages may not add up to 100*

**Table 2.** Area Under the Curve for distinguishing between concussion and **body trauma controls** (no head trauma and no concussion symptoms). Shown is the performance of GFAP and UCH-L1 alone and in combination.

| HOURS POST-INJURY                    | GFAP             | UCH-L1           | COMBINATION GFAP AND UCH-L1 |
|--------------------------------------|------------------|------------------|-----------------------------|
| <b>Enrollment (Children) (n=141)</b> | 0.80 (0.73-0.87) | 0.62 (0.53-0.72) | 0.80 (0.73-0.87)            |
| <b>Enrollment (Adults) (n=422)</b>   | 0.76 (0.71-0.80) | 0.69 (0.64-0.74) | 0.78 (0.73-0.82)            |
| <b>Enrollment (Both) (n= 563)</b>    | 0.76 (0.72-0.80) | 0.67 (0.63-0.72) | 0.78 (0.74-0.81)            |
| <b>4 hours (n= 452)</b>              | 0.76 (0.72-0.80) | 0.65 (0.60-0.70) | 0.77 (0.73-0.81)            |
| <b>8 hours (n=92)</b>                | 0.82 (0.72-0.91) | 0.72 (0.56-0.87) | 0.86 (0.75-0.96)            |
| <b>12 hours (n=68)</b>               | 0.83 (0.73-0.93) | 0.74 (0.58-0.90) | 0.85 (0.74-0.96)            |
| <b>16 hours (n=66)</b>               | 0.84 (0.73-0.95) | 0.77 (0.62-0.91) | 0.86 (0.75-0.97)            |
| <b>20 hours (n=61)</b>               | 0.82 (0.71-0.94) | 0.63 (0.43-0.84) | 0.82 (0.70-0.94)            |
| <b>24 hours (n=56)</b>               | 0.87 (0.76-0.98) | 0.74 (0.58-0.90) | 0.87 (0.74-1.00)            |
| <b>36 hours (n=35)</b>               | 0.86 (0.72-1.00) | 0.76 (0.51-1.00) | 0.90 (0.76-1.00)            |
| <b>48 hours (n=30)</b>               | 0.85 (0.68-1.00) | 0.71 (0.53-0.90) | 0.85 (0.65-1.00)            |
| <b>60 hours (n=27)</b>               | 0.79 (0.57-1.00) | 0.70 (0.50-0.90) | 0.83 (0.61-1.00)            |
| <b>72 hours (n=25)</b>               | 0.87 (0.71-1.00) | 0.78 (0.56-1.00) | 0.94 (0.82-1.00)            |
| <b>84 hours (n=15)</b>               | 0.89 (0.69-1.00) | 0.75 (0.40-1.00) | 0.89 (0.69-1.00)            |
| <b>96 hours (n=13)</b>               | 0.75 (0.39-1.00) | 0.54 (0.18-0.90) | 0.75 (0.49-1.00)            |
| <b>108 hours (n=6)</b>               | n/a              | n/a              | n/a                         |
| <b>120 hours (n=6)</b>               | 0.80 (0.40-1.00) | 0.50 (0.05-0.23) | 0.90 (0.62-1.00)            |
| <b>132 hours (n=2)</b>               | n/a              | n/a              | n/a                         |
| <b>144 hours (n=4)</b>               | n/a              | n/a              | n/a                         |
| <b>156 hours (n=4)</b>               | n/a              | n/a              | n/a                         |
| <b>168 hours (n=2)</b>               | n/a              | n/a              | n/a                         |

n/a – data not available

**Table 3.** Area Under the Curve for distinguishing between concussion and **head trauma controls** (no concussion symptoms) in patients with head trauma. Shown is the performance of GFAP and UCH-L1 alone and in combination.

| HOURS POST-INJURY                    | GFAP             | UCH-L1           | COMBINATION GFAP AND UCH-L1 |
|--------------------------------------|------------------|------------------|-----------------------------|
| <b>Enrollment (Children) (n=128)</b> | 0.64 (0.54-0.73) | 0.54 (0.43-0.66) | 0.63 (0.53-0.72)            |
| <b>Enrollment (Adults) (n=392)</b>   | 0.66 (0.61-0.71) | 0.58 (0.51-0.64) | 0.66 (0.61-0.72)            |
| <b>Enrollment (Both) (n= 520)</b>    | 0.65 (0.60-0.70) | 0.56 (0.51-0.62) | 0.65 (0.60-0.70)            |
| <b>4 hours (n= 421)</b>              | 0.62 (0.57-0.68) | 0.55 (0.49-0.61) | 0.62 (0.57-0.88)            |
| <b>8 hours (n=99)</b>                | 0.72 (0.61-0.82) | 0.61 (0.49-0.73) | 0.72 (0.61-0.82)            |
| <b>12 hours (n=74)</b>               | 0.69 (0.55-0.82) | 0.51 (0.37-0.66) | 0.67 (0.54-0.80)            |
| <b>16 hours (n=69)</b>               | 0.76 (0.64-0.88) | 0.58 (0.39-0.76) | 0.74 (0.62-0.85)            |
| <b>20 hours (n=65)</b>               | 0.68 (0.53-0.83) | 0.41 (0.23-0.59) | 0.66 (0.52-0.81)            |
| <b>24 hours (n=64)</b>               | 0.74 (0.60-0.88) | 0.40 (0.24-0.56) | 0.72 (0.59-0.86)            |
| <b>36 hours (n=44)</b>               | 0.76 (0.61-0.91) | 0.56 (0.37-0.75) | 0.76 (0.61-0.92)            |
| <b>48 hours (n=38)</b>               | 0.81 (0.67-0.95) | 0.52 (0.32-0.73) | 0.79 (0.64-0.93)            |
| <b>60 hours (n=31)</b>               | 0.86 (0.73-1.00) | 0.54 (0.34-0.74) | 0.86 (0.73-1.00)            |
| <b>72 hours (n=30)</b>               | 0.78 (0.60-0.95) | 0.43 (0.20-0.66) | 0.71 (0.51-0.91)            |
| <b>84 hours (n=19)</b>               | 0.84 (0.65-1.00) | 0.37 (0.13-0.62) | 0.74 (0.52-0.97)            |
| <b>96 hours (n=16)</b>               | 0.75 (0.51-0.99) | 0.28 (0.02-0.55) | 0.65 (0.38-0.91)            |
| <b>108 hours (n=8)</b>               | 0.67 (0.26-1.00) | 0.17 (0-0.47)    | 0.33 (0-0.71)               |
| <b>120 hours (n=7)</b>               | 0.80 (0.46-1.00) | 0.20 (0-0.58)    | 0.70 (0.30-1.00)            |
| <b>132 hours (n=4)</b>               | 0.75 (0.20-1.00) | 0 (0-0)          | 0.50 (0-1.00)               |
| <b>144 hours (n=6)</b>               | 0.75 (0.20-1.00) | 0 (0-0)          | 0.50 (0.01-0.99)            |
| <b>156 hours (n=6)</b>               | 0.75 (0.34-1.00) | 0 (0-0)          | 0.50 (0.01-0.99)            |
| <b>168 hours (n=4)</b>               | 0.75 (0.20-1.00) | 0.13 (0-1.00)    | 0.63 (0-1.00)               |

**Table 4.** Area Under the Curve for distinguishing between concussion and **all trauma controls** (head and body controls with no concussion). Shown is the performance of GFAP and UCH-L1 alone and in combination.

| <b>HOURS POST-INJURY trauma</b>      | <b>GFAP</b>      | <b>UCH-L1</b>    | <b>COMBINATION GFAP AND UCH-L1</b> |
|--------------------------------------|------------------|------------------|------------------------------------|
| <b>Enrollment (Children) (n=175)</b> | 0.73 (0.66-0.81) | 0.59 (0.51-0.67) | 0.73 (0.65-0.80)                   |
| <b>Enrollment (Adults) (n=537)</b>   | 0.71 (0.67-0.76) | 0.64 (0.59-0.69) | 0.73 (0.68-0.77)                   |
| <b>Enrollment (Both) (n= 712)</b>    | 0.71 (0.67-0.75) | 0.63 (0.59-0.67) | 0.72 (0.68-0.76)                   |
| <b>4 hours (n= 567)</b>              | 0.70 (0.66-0.74) | 0.61 (0.56-0.65) | 0.70 (0.66-0.75)                   |
| <b>8 hours (n=109)</b>               | 0.75 (0.66-0.84) | 0.65 (0.54-0.75) | 0.77 (0.68-0.86)                   |
| <b>12 hours (n=80)</b>               | 0.73 (0.62-0.85) | 0.59 (0.46-0.72) | 0.73 (0.62-0.85)                   |
| <b>16 hours (n=73)</b>               | 0.79 (0.69-0.90) | 0.64 (0.49-0.80) | 0.78 (0.68-0.89)                   |
| <b>20 hours (n=70)</b>               | 0.73 (0.61-0.86) | 0.49 (0.33-0.65) | 0.72 (0.59-0.84)                   |
| <b>24 hours (n=67)</b>               | 0.77 (0.64-0.89) | 0.47 (0.31-0.63) | 0.75 (0.63-0.88)                   |
| <b>36 hours (n=46)</b>               | 0.77 (0.63-0.91) | 0.59 (0.41-0.77) | 0.78 (0.64-0.92)                   |
| <b>48 hours (n=40)</b>               | 0.81 (0.68-0.95) | 0.55 (0.37-0.74) | 0.80 (0.66-0.93)                   |
| <b>60 hours (n=33)</b>               | 0.85 (0.71-0.98) | 0.58 (0.39-0.77) | 0.86 (0.73-0.98)                   |
| <b>72 hours (n=32)</b>               | 0.80 (0.64-0.95) | 0.51 (0.29-0.73) | 0.76 (0.59-0.94)                   |
| <b>84 hours (n=20)</b>               | 0.85 (0.67-1.00) | 0.44 (0.18-0.69) | 0.77 (0.56-0.98)                   |
| <b>96 hours (n=17)</b>               | 0.75 (0.51-0.98) | 0.33 (0.07-0.60) | 0.67 (0.41-0.92)                   |
| <b>108 hours (n=8)</b>               | 0.67 (0.26-1.00) | 0.17 (0-0.47)    | 0.33 (0-0.71)                      |
| <b>120 hours (n=8)</b>               | 0.80 (0.48-1.00) | 0.30 (0-0.69)    | 0.77 (0.42-1.00)                   |
| <b>132 hours (n=4)</b>               | 0.75 (0.20-1.00) | 0 (0-0)          | 0.50 (0-1.00)                      |
| <b>144 hours (n=6)</b>               | 0.75 (0.34-1.00) | 0 (0-0)          | 0.50 (0.01-0.99)                   |
| <b>156 hours (n=6)</b>               | 0.75 (0.34-1.00) | 0.38 (0-0.85)    | 0.63 (0.15-1.00)                   |
| <b>168 hours (n=4)</b>               | 0.75 (0.20-1.00) | 0.13 (0-1.00)    | 0.63 (0-1.00)                      |

Figure 1. Flow diagram of screened and enrolled patients

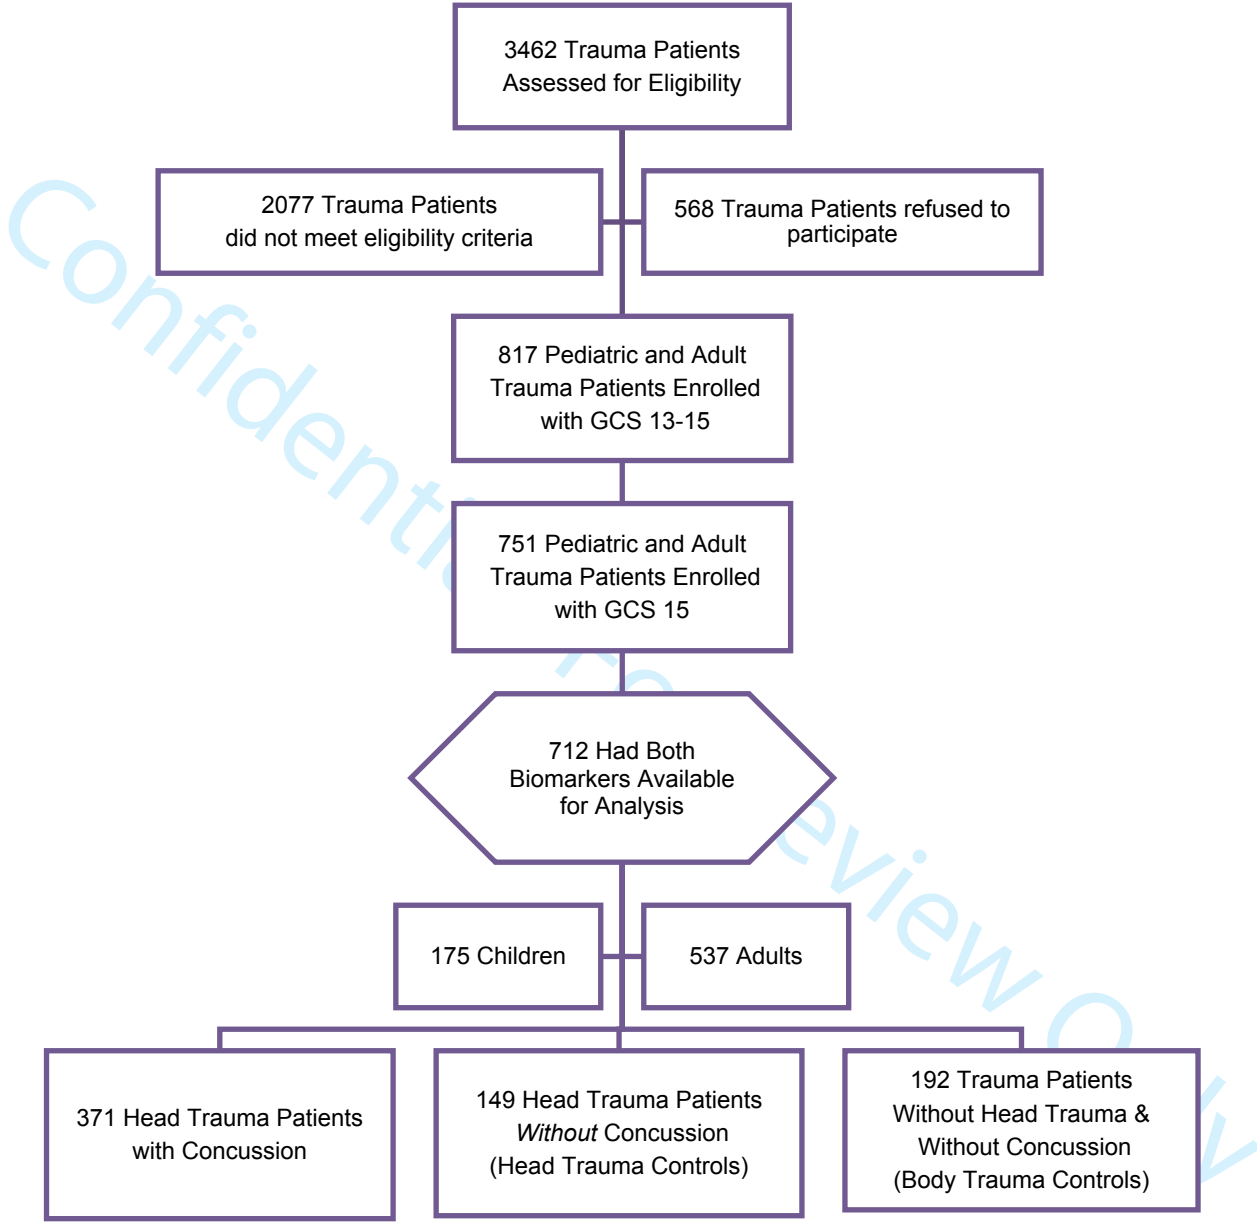

1  
2  
3  
4  
5  
6  
7  
8  
9  
10  
11  
12  
13  
14  
15  
16  
17  
18  
19  
20  
21  
22  
23  
24  
25  
26  
27  
28  
29  
30  
31  
32  
33  
34  
35  
36  
37  
38  
39  
40  
41  
42  
43  
44  
45  
46  
47  
48  
49  
50  
51

**Figure 2.** Temporal Profile of GFAP and UCH-L1 in three groups of trauma patients

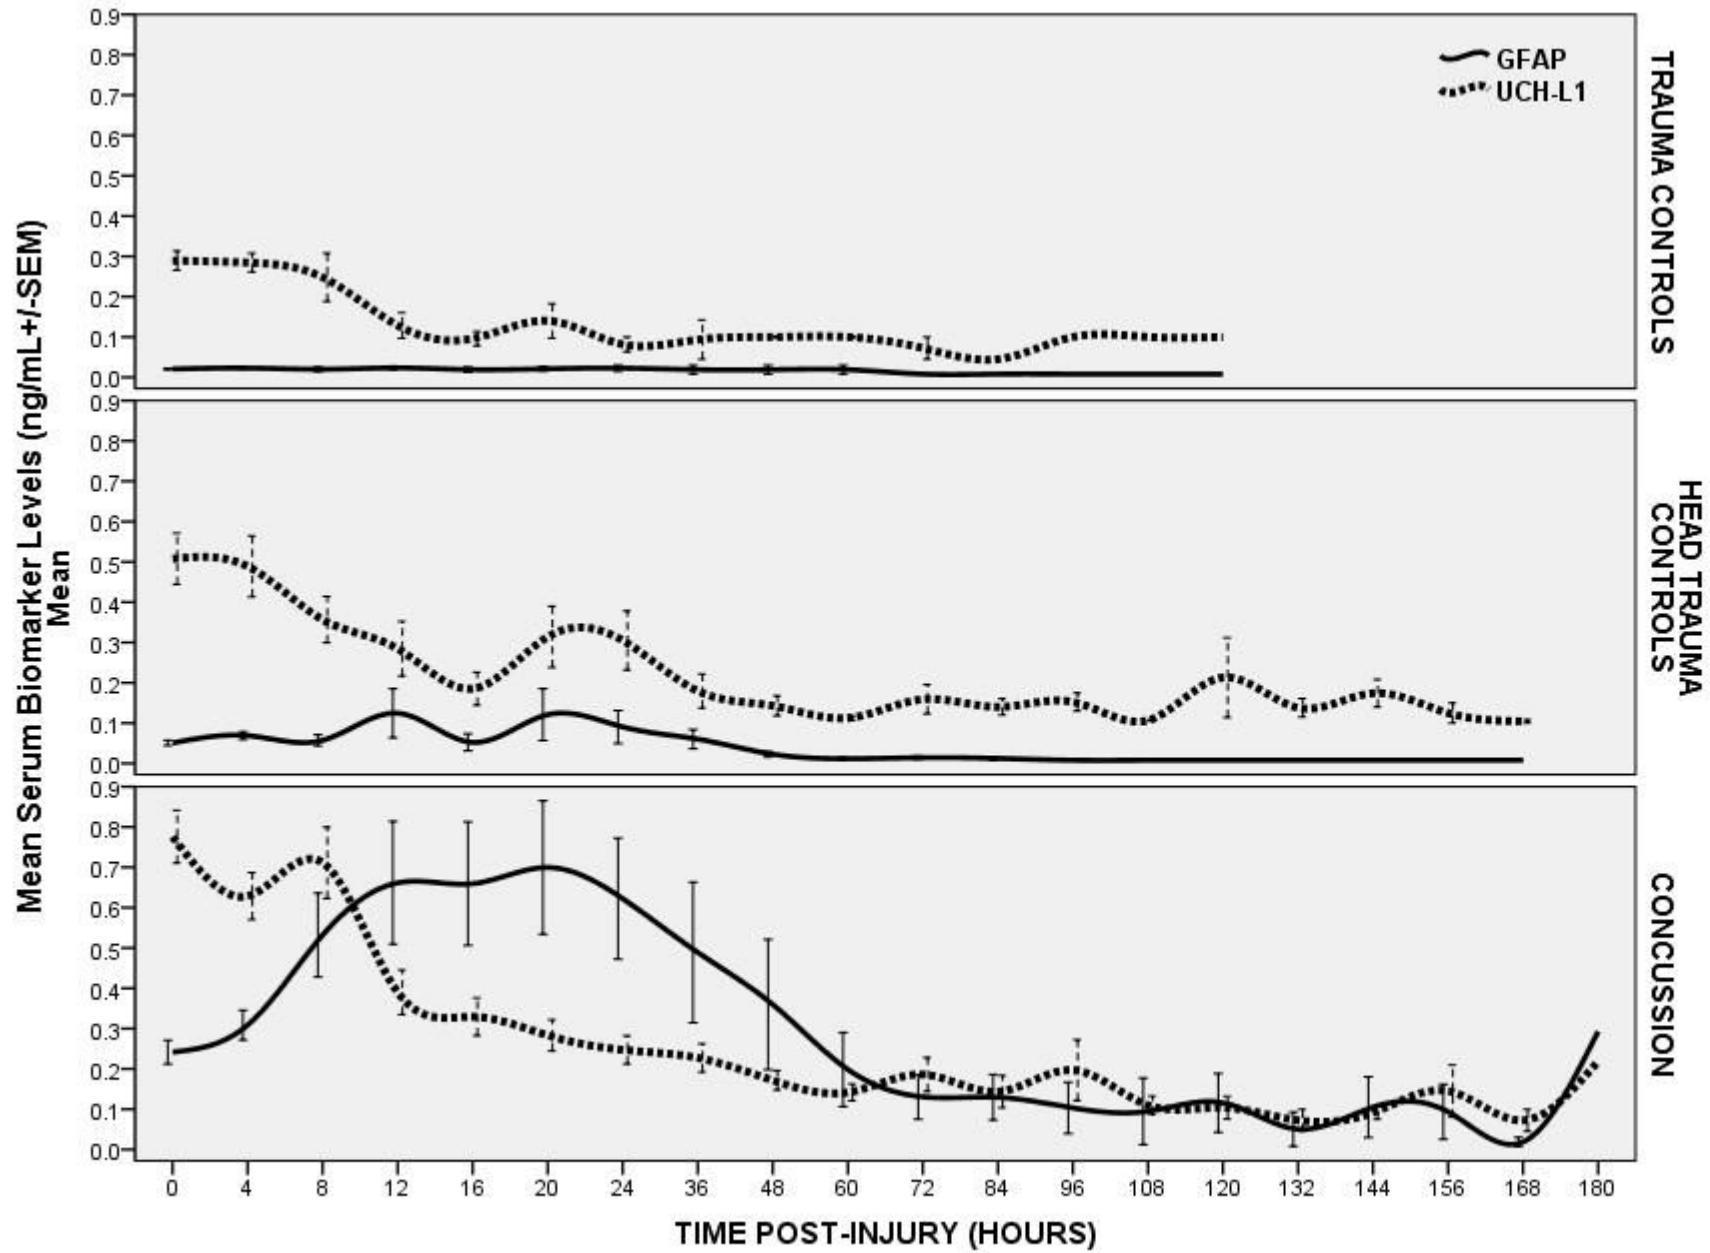



**Figure 3.** Boxplot comparing initial levels of GFAP and UCH-L1 in three groups of trauma patients: 1) trauma controls without head trauma (controls), 2) head trauma controls without concussion (no concussion); and 3) head trauma with concussion (concussion).

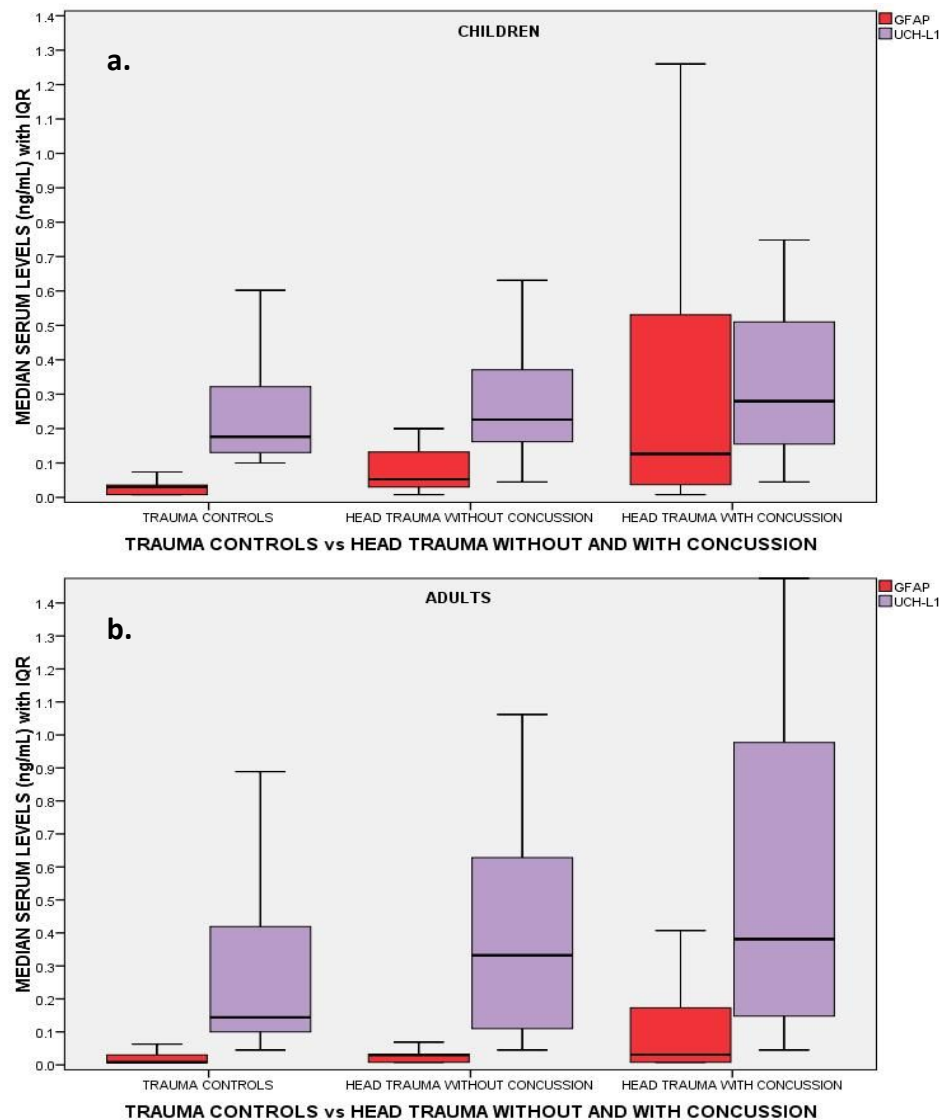

| MULTIPLE COMPARISONS                  | CHILDREN<br>N=176 | ADULTS<br>N=537 |
|---------------------------------------|-------------------|-----------------|
| <b>GFAP</b>                           |                   |                 |
| Trauma Control vs Head Trauma Control | <0.001            | <0.001          |
| Trauma Control vs Concussion          | <0.001            | <0.001          |
| Head Trauma Control vs Concussion     | <0.001            | <0.001          |
| <b>UCH-L1</b>                         |                   |                 |
| Trauma Control vs Head Trauma Control | 0.410             | 0.002           |
| Trauma Control vs Concussion          | 0.045             | <0.001          |
| Head Trauma Control vs Concussion     | 0.894             | 0.017           |

\*Controlled for multiple comparisons

**Figure 4.** ROC Curves comparing initial levels of GFAP and UCH-L1 (individually and in combination) for predicting a concussion in trauma patients excluding patients with traumatic intracranial lesions on CT.

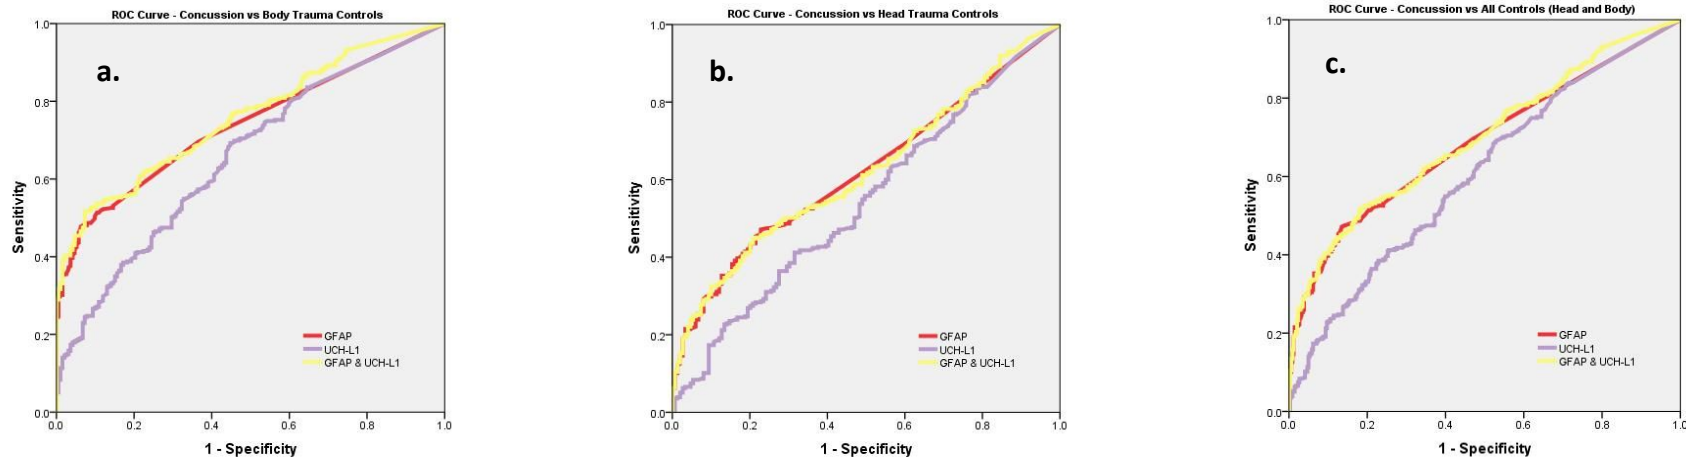

| CONCUSSION VS NO CONCUSSION<br>(EXCLUDING PATIENTS WITH POSITIVE CT) | CHILDREN<br>N=175       | ADULTS<br>N=537         | *ALL PATIENTS<br>N=712  |
|----------------------------------------------------------------------|-------------------------|-------------------------|-------------------------|
| Concussion vs Body Trauma (No Concussion)                            | n=80 & n=47             | n=255 & n=145           | n=335 & n=149           |
| GFAP                                                                 | <b>0.77</b> (0.68-0.85) | <b>0.74</b> (0.69-0.79) | <b>0.74</b> (0.70-0.78) |
| UCH-L1                                                               | <b>0.58</b> (0.48-0.69) | <b>0.68</b> (0.62-0.73) | <b>0.66</b> (0.61-0.70) |
| GFAP & UCH-L1                                                        | <b>0.76</b> (0.68-0.84) | <b>0.76</b> (0.72-0.81) | <b>0.76</b> (0.72-0.80) |
| Concussion vs Head Trauma (No Concussion)                            | n=80 & n=34             | n=255 & n=115           | n=335 & n=192           |
| GFAP                                                                 | 0.58 (0.47-0.68)        | 0.64 (0.58-0.70)        | 0.62 (0.57-0.67)        |
| UCH-L1                                                               | 0.50 (0.39-0.62)        | 0.56 (0.50-0.62)        | 0.54 (0.49-0.60)        |
| GFAP & UCH-L1                                                        | 0.57 (0.46-0.67)        | 0.64 (0.58-0.70)        | 0.62 (0.57-0.67)        |
| Concussion vs Head and Body Trauma Controls                          | n=80 & n=81             | n=255 & n=260           | n=335 & n=341           |
| GFAP                                                                 | 0.69 (0.60-0.77)        | 0.70 (0.65-0.74)        | 0.69 (0.65-0.73)        |
| UCH-L1                                                               | 0.55 (0.46-0.64)        | 0.63 (0.58-0.67)        | 0.61 (0.56-0.65)        |
| GFAP & UCH-L1                                                        | 0.68 (0.60-0.76)        | 0.71 (0.66-0.75)        | 0.70 (0.66-0.74)        |

\*Depicted in the ROC curve graphs

# BMJ Paediatrics Open

## Evaluating Glial and Neuronal Blood Biomarkers GFAP and UCH-L1 as Gradients of Brain Injury in Concussive, Subconcussive and Nonconcussive Trauma: a Prospective Cohort Study

|                               |                                                                                                                                                                                                                                                                                                                                                                                                                                                                                                                                                                                                                                                                                                                                                                                                                                          |
|-------------------------------|------------------------------------------------------------------------------------------------------------------------------------------------------------------------------------------------------------------------------------------------------------------------------------------------------------------------------------------------------------------------------------------------------------------------------------------------------------------------------------------------------------------------------------------------------------------------------------------------------------------------------------------------------------------------------------------------------------------------------------------------------------------------------------------------------------------------------------------|
| Journal:                      | <i>BMJ Paediatrics Open</i>                                                                                                                                                                                                                                                                                                                                                                                                                                                                                                                                                                                                                                                                                                                                                                                                              |
| Manuscript ID                 | bmjpo-2019-000473.R1                                                                                                                                                                                                                                                                                                                                                                                                                                                                                                                                                                                                                                                                                                                                                                                                                     |
| Article Type:                 | Original article                                                                                                                                                                                                                                                                                                                                                                                                                                                                                                                                                                                                                                                                                                                                                                                                                         |
| Date Submitted by the Author: | 15-May-2019                                                                                                                                                                                                                                                                                                                                                                                                                                                                                                                                                                                                                                                                                                                                                                                                                              |
| Complete List of Authors:     | Papa, Linda; Orlando Regional Medical Center, Emergency Medicine<br>Zonfrillo, Mark; Hasbro Children's Hospital<br>Welch, Robert; Wayne State University School of Medicine<br>Lewis, Lawrence; Washington University in Saint Louis<br>Braga, Carolina; Robert Wood Johnson University Hospital<br>Tan, Ciara; Orlando Regional Medical Center<br>Ameli, Neema; Orlando Regional Medical Center, Emergency Medicine<br>Lopez, Marco; Orlando Regional Medical Center, Emergency Medicine<br>Haeussler, Crystal; Orlando Regional Medical Center, Emergency Medicine<br>Mendez Giordano, Diego; Orlando Regional Medical Center, Emergency Medicine<br>Giordano, Philip; Orlando Regional Medical Center, Emergency Medicine<br>Ramirez, Jose; Arnold Palmer Hospital for Children<br>Mittal, Manoj; Children's Hospital of Philadelphia |
| Keywords:                     | Accident & Emergency, Adolescent Health, Biochemistry, General Paediatrics, Neurology                                                                                                                                                                                                                                                                                                                                                                                                                                                                                                                                                                                                                                                                                                                                                    |
|                               |                                                                                                                                                                                                                                                                                                                                                                                                                                                                                                                                                                                                                                                                                                                                                                                                                                          |

SCHOLARONE™  
Manuscripts

1  
2  
3 **Evaluating Glial and Neuronal Blood Biomarkers GFAP and UCH-L1 as Gradients**  
4  
5 **of Brain Injury in Concussive, Subconcussive and Nonconcussive Trauma: a**  
6  
7 **Prospective Cohort Study**  
8  
9

10  
11  
12 *Linda Papa, MDCM, MSc<sup>1,2</sup>; Mark R. Zonfrillo, MD, MSCE<sup>3</sup>; Robert D. Welch, MD,*  
13  
14 *MS<sup>4</sup>; Lawrence M. Lewis, MD<sup>5</sup>; Carolina F. Braga, MD<sup>6</sup>; Ciara N. Tan, BS, MSHS<sup>1</sup>;*  
15  
16 *Neema J. Ameli, BS<sup>1</sup>; Marco A. Lopez, AS<sup>1</sup>; Crystal A. Haeussler, BS<sup>1</sup>; Diego Mendez*  
17  
18 *Giordano, BS<sup>1</sup>; Philip A. Giordano, MD<sup>1,2</sup>; Jose Ramirez, MD<sup>2</sup>; Manoj K. Mittal, MD<sup>7,8</sup>*  
19  
20  
21  
22

23  
24 <sup>1</sup>*Department of Emergency Medicine, Orlando Regional Medical Center, Orlando, Florida*

25  
26 <sup>2</sup>*Department of Pediatric Emergency Medicine, Arnold Palmer Hospital for Children, Orlando,*  
27  
28 *FL*

29  
30 <sup>3</sup>*Department of Emergency Medicine, Alpert Medical School of Brown University and Hasbro*  
31  
32 *Children's Hospital, Providence, RI*

33  
34 <sup>4</sup>*Department of Emergency Medicine, Wayne State University School of Medicine, Michigan*

35  
36 <sup>5</sup>*Division of Emergency Medicine, Washington University School of Medicine, Missouri*

37  
38 <sup>6</sup>*Department of Family Medicine and Community Health, Robert Wood Johnson University*  
39  
40 *Hospital, New Brunswick, NJ*

41  
42 <sup>7</sup>*Division of Emergency Medicine, Children's Hospital of Philadelphia, Philadelphia, PA*

43  
44 <sup>8</sup>*Department of Pediatrics, Perelman School of Medicine, University of Pennsylvania,*  
45  
46 *Philadelphia, PA*  
47  
48  
49  
50  
51  
52  
53  
54  
55  
56  
57  
58  
59  
60

**AUTHORS****Corresponding Author**

Linda Papa, MDCM, MSc

Director of Academic Clinical Research and Attending Emergency Physician

Department of Emergency Medicine

Orlando Regional Medical Center

86 W. Underwood (S-200)

Orlando, Florida, 32806

Tel.: 407-237-6329

Fax: 407-649-3083

[lpstat@aol.com](mailto:lpstat@aol.com)

**Mark R. Zonfrillo, MD, MSCE**

Attending Pediatric Emergency Physician & Associate Professor of Pediatrics

Department of Emergency Medicine, Alpert Medical School of Brown University and

Hasbro Children's Hospital, Providence, RI

[zonfrillo@brown.edu](mailto:zonfrillo@brown.edu)

**Robert D. Welch, MD, MS**

Clinical Professor

Department of Emergency Medicine, Wayne State University School of Medicine

[rwelch@med.wayne.edu](mailto:rwelch@med.wayne.edu)

1  
2  
3 **Lawrence M. Lewis, MD**  
4

5 Professor  
6

7 Division of Emergency Medicine, Washington University School of Medicine  
8

9  
10 [lewisl@wusm.wustl.edu](mailto:lewisl@wusm.wustl.edu)  
11  
12

13  
14  
15 **Carolina F. Braga, MD**  
16

17 Department of Family Medicine and Community Health  
18

19 Robert Wood Johnson University Hospital Residency Program  
20

21  
22 [cbraga1121@gmail.com](mailto:cbraga1121@gmail.com)  
23  
24

25  
26 **Ciara N. Tan, BS, MSHS**  
27

28 Department of Emergency Medicine  
29

30 Orlando Regional Medical Center  
31

32  
33 [Ciara.Tan@orlandohealth.com](mailto:Ciara.Tan@orlandohealth.com)  
34  
35

36  
37  
38 **Neema J. Ameli, BS**  
39

40 Department of Emergency Medicine  
41

42 Orlando Regional Medical Center  
43

44  
45 [Neema.ameli@orlandohealth.com](mailto:Neema.ameli@orlandohealth.com)  
46  
47

48  
49 **Marco A. Lopez, AS, CCRP**  
50

51 Department of Emergency Medicine  
52

53 Orlando Regional Medical Center  
54  
55  
56  
57  
58  
59  
60

1  
2  
3 [Marco.Lopez@orlandohealth.com](mailto:Marco.Lopez@orlandohealth.com)  
4  
5  
6

7  
8 **Crystal A. Haeussler, BS**  
9

10 Department of Emergency Medicine

11  
12 Orlando Regional Medical Center

13  
14 [crystalhaeussler@gmail.com](mailto:crystalhaeussler@gmail.com)  
15  
16  
17

18  
19 **Diego Mendez Giordano, BS**  
20

21 Department of Emergency Medicine

22  
23 Orlando Regional Medical Center

24  
25 [dmengio11@gmail.com](mailto:dmengio11@gmail.com)  
26  
27  
28

29  
30  
31 **Philip A. Giordano, MD**  
32

33 Corporate Director, Research Operations, Orlando Health

34  
35 Attending Emergency Physician

36  
37 Orlando Regional Medical Center

38  
39 [Philip.Giordano@orlandohealth.com](mailto:Philip.Giordano@orlandohealth.com)  
40  
41  
42

43  
44 **Jose Ramirez, MD**  
45

46 Program Director, Pediatric Emergency Medicine Fellowship

47  
48 Attending Pediatric Emergency Physician

49  
50 Arnold Palmer Hospital for Children

51  
52 [Jose.Ramirez@orlandohealth.com](mailto:Jose.Ramirez@orlandohealth.com)  
53  
54  
55  
56  
57  
58  
59  
60

1  
2  
3  
4  
5 **Manoj K. Mittal, MD**  
6

7 Co-Chair, QI and Patient Safety Committee & Director, Emergency Department  
8

9  
10 Extended Care Unit (EDECU)  
11

12 Division of Emergency Medicine  
13

14 Children's Hospital of Philadelphia  
15

16 Associate Professor of Clinical Pediatrics  
17

18 Perelman School of Medicine, University of Pennsylvania  
19

20  
21 [mittal@email.chop.edu](mailto:mittal@email.chop.edu)  
22  
23  
24  
25  
26  
27  
28  
29  
30  
31  
32  
33  
34  
35  
36  
37  
38  
39  
40  
41  
42  
43  
44  
45  
46  
47  
48  
49  
50  
51  
52  
53  
54  
55  
56  
57  
58  
59  
60



**ABSTRACT**

**OBJECTIVES:** To evaluate the ability of GFAP and UCH-L1 to detect concussion in children and adult trauma patients with a normal mental status and assess biomarker concentrations over time as gradients of injury in concussive and nonconcussive head and body trauma.

**DESIGN:** Large prospective cohort study.

**SETTING:** Three Level One Trauma Centers in the United States.

**PARTICIPANTS:** Pediatric and adult trauma patients of all ages, with and without head trauma, presenting with a normal mental status (GCS 15) within 4 hours of injury.

Rigorous screening for concussive symptoms was conducted. Of 3462 trauma patients screened, 751 were enrolled and 712 had biomarker data. Repeated blood sampling was conducted at 4, 8, 12, 16, 24, 36, 48, 60, 72, 84, 96, 108, 120, 132, 144, 156, 168, and 180 hours post-injury in adults.

**MAIN OUTCOMES:** Detection of concussion and gradients of injury in children versus adults by comparing three groups of patients: 1) those with concussion; 2) those with head trauma without overt signs of concussion (nonconcussive head trauma controls); and 3) those with peripheral (body) trauma without head trauma or concussion (nonconcussive body trauma controls).

**RESULTS:** A total of 1904 samples from 712 trauma patients were analyzed. Within 4 hours of injury, there were incremental increases in levels of both GFAP and UCH-L1 from nonconcussive body trauma (lowest), to mild elevations in nonconcussive head trauma, to highest levels in patients with concussion. In concussion patients, GFAP concentrations were significantly higher compared to body trauma controls ( $p < 0.001$ ) and

1  
2  
3 to head trauma controls ( $p < 0.001$ ) in both children and adults, after controlling for  
4 multiple comparisons. However, for UCH-L1 there were no significant differences  
5  
6 between concussion patients and head trauma controls ( $p = 0.894$ ) and between body  
7  
8 trauma and head trauma controls in children. The AUC for initial GFAP levels to detect  
9  
10 concussion was 0.80 (0.73-0.87) in children and 0.76 (0.71-0.80) in adults. This differed  
11  
12 significantly from UCH-L1 with AUCs of 0.62 (0.53-0.72) in children and 0.69 (0.64-  
13  
14 0.74) in adults.  
15  
16  
17  
18

19  
20 **CONCLUSIONS:** In a cohort of trauma patients with normal mental status, GFAP out-  
21  
22 performed UCH-L1 in detecting concussion in both children and adults. Blood levels of  
23  
24 GFAP and UCH-L1 showed incremental elevations across three injury groups, from  
25  
26 nonconcussive body trauma, to nonconcussive head trauma, to concussion. However,  
27  
28 UCH-L1 was expressed at much higher levels than GFAP in those with nonconcussive  
29  
30 trauma, particularly in children. Elevations in both biomarkers in patients with  
31  
32 nonconcussive head trauma may be reflective of a subconcussive brain injury. This will  
33  
34 require further study.  
35  
36  
37  
38  
39  
40

41 **Key Words:**

42  
43 Biomarkers; Concussion; Mild Traumatic Brain Injury; Subconcussive, Head Trauma,  
44  
45 Trauma, Children; Pediatric; Glial fibrillary acidic protein (GFAP), Ubiquitin C-terminal  
46  
47 hydrolase (UCH-L1); Blood test  
48  
49  
50  
51  
52  
53  
54  
55  
56  
57  
58  
59  
60

## INTRODUCTION

Glial Fibrillary Acidic Protein (GFAP) and Ubiquitin C-terminal hydrolase (UCH-L1) have been evaluated in several studies to determine the need for CT scan and neurosurgical intervention in mild to moderate TBI patients (mmTBI) in adults<sup>1-7</sup> and more recently in children with mmTBI.<sup>8-10</sup> In early 2018, GFAP and UCH-L1 were FDA-approved for clinical use in adult patients with mmTBI to help determine need for CT scan within 12 hours of injury.<sup>11</sup> The approval was based on the ability to find lesions on CT scan but was not approved to diagnose a concussion or a mild TBI. Moreover, it was not approved for use in children.

Following trauma, patients often have a constellation of injuries and it is important that TBI biomarkers indicate brain-specific injury in order to be clinically useful. A number of articles have described how GFAP and UCH-L1 were able to distinguish mmTBI patients from orthopedic controls and motor vehicle crash controls as well as in those TBI patients with negative CT's.<sup>1, 3, 4</sup> In these studies, many trauma control patients were exposed to significant trauma including the acceleration-deceleration vectors of MVCs and substantial falls and both GFAP and UCH-L1 showed a graded response to severity of injury from normal controls to trauma controls, to mild and moderate TBI. Moreover, GFAP has consistently shown very good specificity to brain injury in cases of polytrauma.<sup>3, 12</sup> GFAP has demonstrated the ability to detect intracranial lesions in victims of multiple trauma with mild TBI who had substantial extracranial injuries and fractures.<sup>3</sup>

Importantly, there is a group of individuals with head trauma who have been significantly understudied, and in whom biomarkers are rarely, if at all, examined. These

1  
2  
3 are people who experience head trauma without symptoms of concussion. They may be  
4  
5 classified as having “no injury” or they may represent milder forms of concussion that do  
6  
7 not elicit the typical signs or symptoms associated with concussion and are referred to as  
8  
9 subconcussive injuries. To date, there is a paucity of studies addressing the effects of  
10  
11 subconcussive head impacts following head trauma. The issue of subconcussive trauma  
12  
13 has been a particular concern in military personnel<sup>13</sup> and in athletes, as repetitive  
14  
15 subconcussive impacts have the potential for long-term deleterious effects.<sup>14-16</sup> Therefore,  
16  
17 studying these biomarkers in patients with head trauma without symptoms could provide  
18  
19 unique insights into how neuronal and glial biomarkers behave in subconcussive  
20  
21 trauma.<sup>17</sup>  
22  
23  
24  
25

26  
27 There is insufficient data on the diagnostic accuracy of GFAP and UCH-L1 in  
28  
29 children and adults in determining which trauma patients with normal mental status have  
30  
31 a concussion and how well they perform over time following different degrees of mild  
32  
33 head trauma. This study evaluated the diagnostic accuracy of serum glial and neuronal  
34  
35 serum biomarkers GFAP and UCH-L1, both individually and in combination, in  
36  
37 detecting the presence of a concussion and grading potential subconcussive and  
38  
39 nonconcussive brain injury in pediatric and adult trauma patients presenting to the  
40  
41 emergency department with a normal mental status (GCS score of 15). Gradients of brain  
42  
43 injury were defined by comparing serum biomarker concentrations in three groups of  
44  
45 patients: 1) those with concussion; 2) those with blunt head trauma without overt signs or  
46  
47 symptoms of concussion (head trauma controls); and 3) those with peripheral (body)  
48  
49 trauma without head trauma or concussion (body trauma controls). Additionally, the  
50  
51  
52  
53  
54  
55  
56  
57  
58  
59  
60

1  
2  
3 temporal profile of GFAP and UCH-L1 were measured over seven days in these three  
4  
5 groups in adults.  
6  
7  
8  
9

## 10 **METHODS**

### 11 *Study Population*

12  
13  
14 This prospective cohort study enrolled a convenience sample of adult and pediatric  
15  
16 trauma patients presenting to the emergency departments of three Level I Trauma  
17  
18 Centers: a Pediatric Level 1 Trauma Center in Philadelphia, Pennsylvania, a Pediatric  
19  
20 Level 1 Trauma Center in Orlando, Florida, and an affiliated Adult Level 1 trauma center  
21  
22 in Orlando, Florida. This study was approved by the respective Institutional Review  
23  
24 Boards (IRB) of each institution. Informed consent was obtained from patients and/or  
25  
26 their legal authorized representatives prior to enrollment and assent was obtained for  
27  
28 children between the ages of 7 to 18 years.  
29  
30  
31  
32  
33  
34  
35  
36

37 Eligibility for concussion patients was determined by the treating physician based  
38  
39 on the history of blunt head trauma followed by either loss of consciousness, amnesia, or  
40  
41 disorientation (or change in behavior in children) and presenting to the emergency  
42  
43 department within 4 hours of injury with a Glasgow Coma Scale (GCS) Score of 15.  
44  
45 Eligibility was also prospectively verified by the research team prior to enrollment. Head  
46  
47 CT Scans were performed at the discretion of the treating physician. Patients were  
48  
49 excluded if they: 1) had no history of trauma as their primary event (e.g. syncope or  
50  
51 seizure); 2) had known dementia, chronic psychosis or active CNS pathology; 3) were  
52  
53 pregnant; or 4) were incarcerated or 5) had hemodynamic instability.  
54  
55  
56  
57  
58  
59  
60

Both nonconcussive trauma groups, the body trauma control patients (no head trauma and no concussion) and the head trauma control patients (head trauma and no concussion) had a GCS score of 15 presenting to the emergency department with a traumatic mechanism of injury but without concussion. They experienced similar mechanisms of injury as the concussion group and all had a normal mental status since injury (as verified by the research team prospectively by at least two different sources) and had no evidence of acute brain injury or hemodynamic instability. Peripheral (body) trauma controls were primarily composed of orthopedic and soft tissue injuries. These patients were carefully screened to ensure they had no loss of consciousness, no amnesia and no alteration in sensorium at any time after injury. The purpose of enrolling nonconcussive body trauma controls and nonconcussive head trauma controls was to have appropriate comparison groups to compare the accuracy of the biomarkers in detecting concussion and simulate the realworld challenges faced by clinicians. The head trauma controls provided an opportunity to assess biomarker release in the setting of head trauma without symptoms and the potential for subconcussive brain injury.

### *Study Procedures*

All initial patient assessments were made by board certified adult and pediatric emergency medicine physicians trained by a formal one-hour session on evaluating patient eligibility for the study. Following the initial screening, a meticulous secondary assessment was conducted by the research team. All prehospital and emergency department records were reviewed, patients, families and witnesses (if available) were carefully questioned and the final determination was made by the emergency physician together with the research team. Patient classification was performed prospectively.

1  
2  
3 Blood samples were obtained within 4 hours of time of injury. Repeated blood sampling  
4  
5 was conducted for as long as the patient remained in hospital at 4, 8, 12, 16, 24, 36, 48,  
6  
7 60, 72, 84, 96, 108, 120, 132, 144, 156, 168 and 180 hours after injury and discontinued  
8  
9 when discharged. Patient management was not altered by the study. For each blood draw  
10  
11 a single vial of approximately 5mL of blood was collected and placed in a serum  
12  
13 separator tube and allowed to clot at room temperature. The blood was centrifuged within  
14  
15 30 minutes and the serum was placed in bar-coded aliquot containers and stored in a  
16  
17 freezer at -70 degrees Celsius until it was transported to a central laboratory (Banyan  
18  
19 Biomarkers Inc, Alachua Florida USA). There, the samples were analyzed in batches  
20  
21 using sandwich enzyme-linked immunosorbent assays (ELISA) to GFAP and UCH-L1.  
22  
23 Lab personnel running the samples were blinded to the clinical data.  
24  
25  
26  
27

### 28 *Outcome measures*

29  
30 Performance of GFAP and UCH-L1 was evaluated within 4 hours of injury in  
31  
32 both adults and children and over a 7-day period in hospitalized adults. The main  
33  
34 outcome measures included the performance of the biomarkers in: 1) detecting the  
35  
36 presence of concussion compared to trauma patients without concussion in children and  
37  
38 adults (separately and as a whole); 2) assessing gradients of injury defined by comparing  
39  
40 three groups of patients a) those with concussion, b) those with head trauma without  
41  
42 overt signs of concussion (nonconcussive head trauma controls), and c) those with  
43  
44 peripheral (body) trauma without head trauma or concussion (nonconcussive body trauma  
45  
46 controls); 3) determining the time course of GFAP and UCH-L1 over 7 days after injury  
47  
48 in these three groups in adults.  
49  
50  
51  
52

### 53 *Statistical Analysis*

1  
2  
3 Descriptive statistics with means medians and proportions were used to describe  
4 the data. For statistical analysis, biomarker levels were treated as continuous data,  
5 measured in ng/ml and expressed as medians with interquartile range. Data were assessed  
6 for equality of variance and distribution. Logarithmic transformations were conducted on  
7 non-normally distributed data. Group comparisons for different trauma groups were  
8 performed using analysis of variance with multiple comparisons using Games-Howell  
9 post-hoc test. Receiver Operating Characteristics (ROC) curves were created to explore  
10 the ability of the biomarkers to identify the presence of a concussion. Estimates of the  
11 area under these curves (AUC) were obtained (AUC=0.5 indicates no discrimination and  
12 an AUC=1.0 indicates a perfect diagnostic test).  
13  
14  
15  
16  
17  
18  
19  
20  
21  
22  
23  
24  
25

26 A power analysis yielded a sample of 281 cases of concussion and 141 cases  
27 without concussion achieves an 80% power to detect a difference of 0.06 between the  
28 area under the ROC curve (AUC) under the null hypothesis of 0.81 and an AUC under  
29 the alternative hypothesis of 0.75 using a two-sided z-test at a significance level of 0.05.  
30 All analyses were performed using the statistical software package SPSS 22.0 (IBM  
31 Corporation®, Somers NY).  
32  
33  
34  
35  
36  
37  
38  
39  
40

#### 41 *Biomarker Analysis*

42  
43 Serum GFAP and UCH-L1 levels were measured in duplicate for each sample  
44 using a validated ELISA platform (Banyan Biomarkers Inc., Alachua Florida USA). For  
45 the GFAP assay, the lower limit of quantification (LLOQ) is 0.030ng/ml and upper limit  
46 of quantification (ULOQ) is 50ng/ml. The limit of detection (LoD) is 0.008ng/mL. For  
47 the UCH-L1 assay, the lower limit of quantification (LLOQ) is 0.100ng/ml and upper  
48 limit of quantification (ULOQ) is 9ng/ml. The limit of detection (LoD) is 0.045ng/mL.  
49  
50  
51  
52  
53  
54  
55  
56  
57  
58  
59  
60



1  
2  
3 Any samples yielding a signal over the quantification or calibrator range were diluted and  
4  
5 re-assayed.  
6

7  
8 Patients and the public were not involved in the design, recruitment or conduct of  
9  
10 the study.  
11

## 12 13 14 **RESULTS**

15  
16  
17 Over the study period, 3462 pediatric and adult trauma patients were screened,  
18  
19 1385 met eligibility criteria, 751 with a GCS score of 15 were enrolled and 712 had  
20  
21 biomarker data available for analysis (Figure 1). Of those enrolled, 371 (52%) had a  
22  
23 concussion, 149 (21%) had nonconcussive head trauma (head trauma controls), and 192  
24  
25 (27%) had nonconcussive body trauma without head trauma (body trauma controls). The  
26  
27 flow diagram in Figure 1 describes the distribution of enrolled patients. There were 175  
28  
29 (25%) children and 537 (75%) adults. The distribution of clinical characteristics of all  
30  
31 enrolled patients is presented in Table 1. The overall injury severity score in children and  
32  
33 adults was consistent with median scores of 4.  
34  
35  
36  
37

38  
39 There were a total of 1904 samples drawn in 712 patients. Patients had serum  
40  
41 samples drawn within 4 hours of injury (16 children had samples drawn between 4 and 8  
42  
43 hours) with the average time from injury to serum sample collection of 3.1 hours (SD  
44  
45 0.9). Seven hundred and twelve patients had initial samples drawn at enrollment, 567  
46  
47 patients had samples at 4-hours post-injury, 109 at 8-hours post-injury, 80 at 12 hours  
48  
49 post-injury, 73 at 16-hours post-injury; 70 at 20-hours post-injury, 67 at 24-hours post-  
50  
51 injury, 46 at 36-hours post-injury, 40 at 48-hours post-injury, 33 at 60-hours post-injury,  
52  
53 32 at 72-hours post-injury, 20 at 84-hours post-injury, 17 at 96-hours post-injury, 8 at  
54  
55  
56  
57  
58  
59  
60

1  
2  
3 108-hours post-injury, 8 at 120-hours post-injury, 4 at 132-hours post-injury, 6 at 144-  
4  
5 hours post-injury, 6 at 156-hours post-injury, and 4 at 168-hours post-injury.  
6  
7

8           Among body trauma control patients, 229 (60%) samples were below the LLOD  
9  
10 and 90 (24%) below the LLOQ for GFAP. In head trauma control patients 144 (38%)  
11  
12 samples were below the LLOD and 88 (24%) below the LLOQ for GFAP. In concussion  
13  
14 patients, 276 (24%) samples were below the LLOD and 172 (15%) below the LLOQ for  
15  
16 GFAP. Among body trauma control patients, 61 (16%) samples were below the LLOD  
17  
18 and 70 (19%) below the LLOQ for UCH-L1. In head trauma control patients 34 (9%)  
19  
20 samples were below the LLOD and 39 (10%) below the LLOQ for UCH-L1. In  
21  
22 concussion patients, 128 (11%) samples were below the LLOD and 103 (11%) below the  
23  
24 LLOQ for UCH-L1.  
25  
26  
27

28  
29           The time course of GFAP and UCH-L1 over a week post trauma is depicted in  
30  
31 Figure 2 and contrasted in three groups of patients (concussion, head trauma controls, and  
32  
33 body trauma controls). In the concussion patients the serum concentration of GFAP was  
34  
35 detectable within 1 hour of injury and reached a peak at 20 hours post-injury and  
36  
37 decreased over 72 hours. GFAP concentrations exhibited a slower decline thereafter but  
38  
39 were still detectable at 168 hours (7 days) post-injury. In contrast, UCH-L1 rose very  
40  
41 rapidly after injury, reached a peak at 8 hours, decreased quickly to 12 hours and was  
42  
43 followed by a slower decline to 60 hours post-injury. Subsequently, UCH-L1, like GFAP,  
44  
45 exhibited some smaller peaks and troughs over 7 days and was also detectable at 168  
46  
47 hours post-injury.  
48  
49  
50

51  
52  
53           In head trauma controls GFAP levels were remarkably lower than in the  
54  
55 concussion patients with very slight elevations until 48 hours. The peak appeared at 20  
56  
57  
58  
59  
60

1  
2  
3 hours (as in the concussion patients) and after 48 hours GFAP levels remained almost  
4 undetectable. Interestingly, in head trauma controls UCH-L1 levels peaked within 4  
5  
6 hours and remained lower than concussion patients over 12 hours. Thereafter, UCH-L1  
7  
8 concentrations become quite variable with levels either slightly lower, at par, or slightly  
9  
10 higher than concussion patients.  
11  
12  
13

14  
15 In body trauma control patients, concentrations of GFAP were negligible over  
16  
17 time without any appreciable elevations. Initial UCH-L1 levels were slightly elevated but  
18  
19 significantly lower than either head trauma or concussion patients. UCH-L1 levels  
20  
21 decreased quickly over 12 hours (as it did in the head trauma controls) and levels  
22  
23 remained noticeably elevated over the next several days.  
24  
25  
26

27 The ability of GFAP and UCH-L1, individually and in combination, to distinguish  
28  
29 concussion patients from body trauma controls (Table 2) and head trauma controls (Table  
30  
31 3) over time was assessed by calculating the area under the ROC Curve (AUC) at each  
32  
33 time-point post-injury. A comparison between concussion and both trauma and head  
34  
35 trauma controls can be found in Table 4. When comparing concussion patients to body  
36  
37 trauma controls, GFAP demonstrated a range of AUC's between 0.75 (0.39-1.00) to 0.89  
38  
39 (0.69-1.00) and UCH-L1 demonstrated AUC's between 0.50 (0.05-0.23) to 0.78 (0.56-  
40  
41 1.00). When GFAP and UCH-L1 were combined, the AUC ranged from 0.75 (0.49-1.00)  
42  
43 to 0.90 (0.76-1.00) and closely mimicked the pattern of GFAP. GFAP out-performed  
44  
45 UCH-L1 at all time-points. The combination of GFAP and UCH-L1 marginally out-  
46  
47 performed GFAP alone at some time-points, however, the differences were not  
48  
49 statistically significant.  
50  
51  
52  
53  
54  
55  
56  
57  
58  
59  
60

1  
2  
3 When comparing concussion patients to head trauma controls, GFAP  
4  
5 demonstrated a range of AUC's between 0.62 (0.57-0.68) and 0.86 (0.73-1.00) and UCH-  
6  
7 L1 demonstrated AUC's between 0.13 (0-1.00) to 0.61 (0.49-0.73). When GFAP and  
8  
9 UCH-L1 were combined, the AUC ranged from 0.33 (0-0.71) to 0.86 (0.73-1.00). GFAP  
10  
11 out-performed UCH-L1 at all time-points and out-performed the combination of the two  
12  
13 biomarkers at all time-points.  
14  
15

16  
17 A comparison of the performance of GFAP and UCH-L1 measured within 4 hours  
18  
19 of injury in children and adults is shown in Figure 3. There are incremental increases in  
20  
21 levels of GFAP and UCH-L1 from nonconcussive body trauma controls to nonconcussive  
22  
23 head trauma controls to patients with concussion. In concussion patients, GFAP  
24  
25 concentrations were significantly higher compared to body trauma controls ( $p < 0.001$ ) and  
26  
27 to head trauma controls ( $p < 0.001$ ) in both children and adults, after controlling for  
28  
29 multiple comparisons. There were also significantly higher levels of GFAP in head  
30  
31 trauma controls compared to body trauma controls in children ( $p < 0.001$ ) and adults  
32  
33 ( $p < 0.001$ ). In adults, concentrations of UCH-L1 measured within 4 hours of injury were  
34  
35 also significantly higher in concussion patients than body trauma controls ( $p < 0.001$ ) and  
36  
37 head trauma controls ( $p = 0.002$ ). There were also significantly higher levels of UCH-L1 in  
38  
39 head trauma controls compared to body trauma controls ( $P = 0.017$ ). Similarly, in children,  
40  
41 concentrations of UCH-L1 were significantly higher in concussion patients than body  
42  
43 trauma controls ( $p = 0.045$ ). However, there were no significant differences between  
44  
45 concussion patients and head trauma controls ( $p = 0.894$ ) and between body trauma and  
46  
47 head trauma controls in children.  
48  
49  
50  
51  
52  
53  
54  
55  
56  
57  
58  
59  
60

1  
2  
3 When ROC Curves were compared in children and adults, the AUC's  
4  
5 demonstrated that initial GFAP levels were able to distinguish concussion patients from  
6  
7 body trauma controls with an AUC of 0.80 (0.73-0.87) in children and 0.76 (0.71-0.80) in  
8  
9 adults (Table 2). In contrast, initial UCH-L1 levels distinguished concussion from body  
10  
11 trauma controls with a significantly lower AUC of 0.62 (0.53-0.72) in children ( $p=0.003$ )  
12  
13 and 0.69 (0.64-0.74) in adults ( $p=0.04$ ) (Table 2). The AUC's for GFAP for  
14  
15 distinguishing concussion patients from head trauma controls was 0.64 (0.54-0.73) in  
16  
17 children and 0.66 (0.61-0.71) in adults. AUC's were lower for UCH-L1 with an AUC of  
18  
19 0.54 (0.43-0.66) in children ( $p=0.23$ ) and 0.58 (0.51-0.64) in adults ( $p=0.04$ ) (Table 3).  
20  
21 Overall, when concussion was compared to all (head and body) trauma control cases  
22  
23 without concussion, the AUC for GFAP was 0.73 (0.66-0.81) in children and 0.71 (0.67-  
24  
25 0.76) in adults. AUC's were significantly lower for UCH-L1 with an AUC of 0.59 (0.51-  
26  
27 0.67) in children ( $p=0.013$ ) and 0.64 (0.59-0.69) in adults ( $p=0.030$ ) (Table 4). There were  
28  
29 significantly higher levels of GFAP and UCH-L1 in those with intracranial lesions on  
30  
31 CT, therefore, we excluded the 36 (8%) patients with CT lesions and found similar results  
32  
33 (Figure 4).  
34  
35  
36  
37  
38  
39  
40  
41  
42

## 43 DISCUSSION

44  
45 This prospective study assessed the diagnostic accuracy of glial and neuronal  
46  
47 biomarkers, GFAP and UCH-L1, for detecting concussion in a very large cohort of  
48  
49 children and adult trauma patients presenting to three Level I trauma centers. The study  
50  
51 investigated the pattern of biomarker release in trauma patients with and without  
52  
53 concussion at twenty distinct time-points, making it is among the first and largest studies  
54  
55  
56  
57  
58  
59  
60

1  
2  
3 to assess the temporal profile of these two biomarkers in three groups of trauma patients  
4  
5 with a normal mental status. In both children and adults, GFAP and UCH-L1  
6  
7 concentrations increased incrementally from those with nonconcussive body trauma to  
8  
9 those with nonconcussive head trauma with highest levels in patients with concussion.  
10  
11 GFAP showed very distinct patterns of release in all three groups, whereas UCH-L1  
12  
13 demonstrated similar patterns of release in all three groups but at much higher  
14  
15 concentrations in both nonconcussive trauma groups. There were significant differences  
16  
17 between the three groups controlling for multiple comparisons for both biomarkers in  
18  
19 adults, however, UCH-L1 could not distinguish concussive from nonconcussive head  
20  
21 trauma in children.  
22  
23  
24  
25

26 When the time course of GFAP and UCH-L1 was contrasted in three groups of  
27  
28 patients (concussion, head trauma controls, and body trauma controls), GFAP showed a  
29  
30 clear increase over the first 20 hours post-injury and decline from 20 to 72 hours in  
31  
32 concussion patients and was still detectable at 7 days post-injury making it potentially  
33  
34 useful over a week from injury. Although GFAP was mildly elevated in head trauma  
35  
36 without concussion, the expression was very low and very early compared to concussion.  
37  
38 In body trauma control patients, concentrations of GFAP were negligible over all time  
39  
40 points suggesting very good specificity for concussion. These results are consistent with  
41  
42 previous studies showing how robust it is in multiple trauma.<sup>3,4</sup> In contrast, UCH-L1 rose  
43  
44 more rapidly after concussion than GFAP, peaking within 8 hours and steadily decreasing  
45  
46 from 12 to 60 hours. Unexpectedly, UCH-L1 was much higher in the head trauma control  
47  
48 group compared to GFAP at all time-points from injury over seven days. Even more  
49  
50 surprising, was that UCH-L1 was elevated in body trauma too and showed a similar  
51  
52  
53  
54  
55  
56  
57  
58  
59  
60

1  
2  
3 pattern of release as head trauma control patients. Possible explanations for UCH-L1  
4  
5 elevations in control patients include that 1) UCH-L1 may not be completely brain  
6  
7 specific and is released from other organ or tissue trauma, or 2) UCH-L1 is an  
8  
9 ultrasensitive marker of any neuronal disruption that may occur from impacts to the body  
10  
11 that jostle the brain.  
12  
13

14  
15 Given that GFAP appears to be so brain specific and that it also showed low level  
16  
17 elevations in the first 48 hours following head trauma without concussion symptoms  
18  
19 (head trauma controls), these elevations may represent milder forms of concussion that  
20  
21 do not elicit typical signs or symptoms associated with concussion. These injuries may be  
22  
23 irrelevant, or they may represent important trauma that is just below the level of clinical  
24  
25 detection and referred to as subconcussive trauma. Emerging data have demonstrated that  
26  
27 significant alterations in brain function can occur in the absence of clinically obvious  
28  
29 symptoms following even a single head trauma.<sup>15, 18, 19</sup> Given the lack of concussive  
30  
31 symptoms acutely, biomarkers (such as GFAP and UCH-L1) could provide a more  
32  
33 objective measure of injury and potentially identify those at risk for neurocognitive  
34  
35 problems. Studies in athletes have documented that both clinically diagnosed concussion  
36  
37 and subconcussive traumas can induce similar changes in brain structure and functions on  
38  
39 brain imaging.<sup>15, 19-21</sup> These changes include alterations in white matter and  
40  
41 cerebrovascular integrity, blood flow, neuroinflammation, brain activation during  
42  
43 working memory tasks, resting-state functional connectivity, and brain chemistry as  
44  
45 measured by various forms of magnetic resonance imaging (MRI).<sup>20, 22, 23</sup> The effect of  
46  
47 thousands of subconcussive impacts has the potential for long-term deleterious effects on  
48  
49  
50  
51  
52  
53  
54  
55  
56  
57  
58  
59  
60

1  
2  
3 brain function and neurodegeneration in select individuals.<sup>14, 15, 19</sup> In athletes, UCH-L1  
4  
5 has shown elevations in both concussive<sup>24</sup> and subconcussive trauma.<sup>25</sup>  
6  
7

8 To date, there is a lack of research addressing the effects of subconcussive head  
9  
10 impacts following head trauma in an emergency department population. Acute  
11  
12 biomarkers may have a role in assessing these patients if the markers can be shown to  
13  
14 correlate with long-term neurocognitive dysfunction. Most recently, microRNA  
15  
16 biomarkers measured pre and post-season in collegiate football players were associated  
17  
18 with worsening neurocognitive functioning over the course of a season in those with no  
19  
20 concussions.<sup>26</sup>  
21  
22  
23

24 Concussion is a clinical diagnosis that could benefit from a relatively noninvasive  
25  
26 complementary tool such as a blood test.<sup>8, 9, 27-29</sup> Based on these results, the potential  
27  
28 utility of GFAP to distinguish concussion from body trauma controls over 7 days post-  
29  
30 injury was fair to excellent with AUC's of 0.75 to 0.89, and UCH-L1's ability was  
31  
32 guarded and variable with AUC's from poor to good depending on timing of samples  
33  
34 (AUC's of 0.54 to 0.78) with earlier samples being better. The combination of the both  
35  
36 biomarkers did not significantly improve concussion detection among trauma control  
37  
38 patients. The distinction between head trauma patients with and without concussion was  
39  
40 not as robust as with body trauma controls. GFAP performed with fair to very good  
41  
42 AUC's (0.62 to 0.86) over the week post-injury, with optimal performance between 24 to  
43  
44 96 hours. The ability of UCH-L1 to distinguish concussion from head trauma control  
45  
46 patients was very poor with AUC's of 0.13 -0.61 and did not contribute to or improve the  
47  
48 performance of GFAP alone.  
49  
50  
51  
52  
53  
54  
55  
56  
57  
58  
59  
60



1  
2  
3 Since it is not uncommon for patients who have suffered a concussion or mild  
4 TBI not to seek immediate medical attention, understanding when to use the biomarkers  
5 for detection of injury is critical. In the context of developing a point-of-care test, UCH-  
6 L1's early and rapid rise could be useful in the early post injury setting such as in the  
7 ambulance, on the playing field or on the battlefield. The longer half-life of GFAP makes  
8 it a very favorable marker to use in both the acute and subacute phases of injury as it can  
9 detect concussion for up to 7 days after injury.  
10  
11  
12  
13  
14  
15  
16  
17  
18

19  
20 The authors recognize that there are limitations to this study. This study addressed  
21 diagnosis of concussion in the acute care setting and did not describe long-term outcome  
22 in these patients. The main outcomes used in this study reflect current standards of  
23 practice and accepted definitions of concussion. However, future studies to better define  
24 the severity of concussion and mild TBI need to be pursued, particularly when  
25 neuroimaging is negative. Accordingly, we performed an analysis of patients with  
26 negative neuroimaging acutely and found no significant differences in the results whether  
27 we included those with positive scans or not. The number of samples available for  
28 analysis decreased over the course of the study. This reflects the challenge of obtaining  
29 samples over time in patients with less severe injuries because they are not hospitalized  
30 as long. However, there were many patients without TBI and patients with mild TBI who  
31 were captured in our longitudinal sample because they were admitted for other injuries.  
32  
33 Important next steps will be to capture samples within minutes of injury. Uninjured  
34 controls were not included in this analysis as the concentrations of these two biomarkers  
35 have already been well characterized in uninjured normal control patients.<sup>1,2</sup>  
36  
37  
38  
39  
40  
41  
42  
43  
44  
45  
46  
47  
48  
49  
50  
51  
52  
53  
54  
55  
56  
57  
58  
59  
60

## CONCLUSION

In a cohort of trauma patients with normal mental status, GFAP out-performed UCH-L1 in detecting concussion in both children and adults. Blood levels of GFAP and UCH-L1 showed incremental elevations across three injury groups, from nonconcussive body trauma, to nonconcussive head trauma, to concussion. However, UCH-L1 was expressed at much higher levels than GFAP in those with nonconcussive trauma, particularly in children, suggesting that UCH-L1 is either not completely brain specific or ultrasensitive to subtle impacts. Each biomarker exhibited a distinct temporal profile in each trauma group over seven days with earlier elevations in UCH-L1 and more consistent and sustained elevations in GFAP. Furthermore, elevations in both biomarkers in patients with nonconcussive head trauma may be reflective of a subconcussive brain injury. The stage is set for future studies to verify these findings.

## KEY MESSAGES

### What is already known on this topic

In 2018 serum biomarkers Glial Fibrillary Acidic Protein (GFAP) and Ubiquitin C-terminal hydrolase (UCH-L1) were FDA-approved in adults to guide CT scan ordering in mild to moderate traumatic brain injury. However, their ability to detect concussion in either children or adults has not been determined and there currently exists no objective measure to diagnose concussion acutely after injury. The challenge for clinicians is to detect concussion in the setting of head and/or peripheral trauma when patients have a normal mental status. Having an objective measure of concussion would be very helpful in managing trauma patients.

### What this study adds

GFAP out-performed UCH-L1 in detecting concussion in both children and adults within 4 hours of injury. Blood levels of GFAP and UCH-L1 showed incremental elevations across three injury groups, from nonconcussive body trauma, to nonconcussive head trauma, to concussion. UCH-L1 was expressed at much higher levels than GFAP in those with nonconcussive trauma, particularly in children, suggesting that UCH-L1 is either not completely brain specific or ultrasensitive to subtle impacts. Elevations of these biomarkers in nonconcussive head trauma suggests possible subconcussive brain injury. GFAP could be potentially useful to detect concussion for up to a week post-injury.

## ACKNOWLEDGEMENT

**Contributors:** LP had full access to the data in the study and takes responsibility for the integrity of the data and the accuracy of the data analysis. LP conceived and designed the study. Data was acquired by LP, JR, PG, CFB, CNT, NJA, MAL, CAH, DMG, MRZ, and MM. All authors were involved in the analysis and interpretation of the data. LP drafted the manuscript and all authors were involved in critical revision of the manuscript for important intellectual content. Statistical analysis was conducted by LP. Funding was obtained by LP. Administrative, technical, or material support was provided by LP, PG, MRZ, and MM. The study was supervised by LP, JR, PG, CFB, CNT, NJA, MAL, CAH, DMG, MRZ, and MM. The corresponding author attests that all listed authors meet authorship criteria and that no others meeting the criteria have been omitted.

**Funding:** This study was supported by Award Number R01NS057676 (Papa, PI) from the National Institute of Neurological Disorders and Stroke. The content is solely the responsibility of the authors and does not necessarily represent the official views of the National Institute of Neurological Disorders and Stroke or the National Institutes of Health. The funder had no role in the design and conduct of the study; collection, management, analysis, and interpretation of the data; preparation, review, or approval of the manuscript; and decision to submit the manuscript for publication.

**Competing Interests:** Dr. Papa is an unpaid scientific consultant for Banyan Biomarkers, Inc. but receives no stocks or royalties from the company and will not benefit financially from this publication. No other disclosures are reported. Drs. Welch and Lewis receive contract research funding from Banyan Biomarkers Inc. They do not receive stocks or royalties from the company and will not benefit financially from this publication.

**Ethical Approval:** This study was approved by the respective Institutional Review Boards (IRB) of each institution (Orlando Regional Medical Center Institutional Review Board, Arnold Palmer Hospital for Children Institutional Review Board and Children's Hospital of Philadelphia Institutional Review Board).

**Data sharing:** Data are not available for sharing at this time.

**Transparency:** The lead author (LP) affirms that this manuscript is an honest, accurate, and transparent account of the study being reported; that no important aspects of the study have been omitted; and that any discrepancies from the study as planned (and, if relevant, registered) have been explained.

**Dissemination declaration:** Dissemination of results to participants is not possible/applicable.

**REFERENCES**

1. Papa L, Lewis LM, Falk JL, Zhang Z, Silvestri S, Giordano P, et al. Elevated levels of serum glial fibrillary acidic protein breakdown products in mild and moderate traumatic brain injury are associated with intracranial lesions and neurosurgical intervention. *Ann Emerg Med.* 2012;59(6):471-83.
2. Papa L, Lewis LM, Silvestri S, Falk JL, Giordano P, Brophy GM, et al. Serum levels of ubiquitin C-terminal hydrolase distinguish mild traumatic brain injury from trauma controls and are elevated in mild and moderate traumatic brain injury patients with intracranial lesions and neurosurgical intervention. *J Trauma Acute Care Surg.* 2012;72(5):1335-44.
3. Papa L, Silvestri S, Brophy GM, Giordano P, Falk JL, Braga CF, et al. GFAP Out-Performs S100beta in Detecting Traumatic Intracranial Lesions on Computed Tomography in Trauma Patients with Mild Traumatic Brain Injury and Those with Extracranial Lesions. *J Neurotrauma.* 2014;31(22):1815-22.
4. Papa L, Brophy GM, Welch RD, Lewis LM, Braga CF, Tan CN, et al. Time Course and Diagnostic Accuracy of Glial and Neuronal Blood Biomarkers GFAP and UCH-L1 in a Large Cohort of Trauma Patients With and Without Mild Traumatic Brain Injury. *JAMA Neurol.* 2016;73(5):551-60.
5. Welch RD, Ellis M, Lewis LM, Ayaz SI, Mika VH, Millis S, et al. Modeling the Kinetics of Serum Glial Fibrillary Acidic Protein, Ubiquitin Carboxyl-Terminal

1  
2  
3 Hydrolase-L1, and S100B Concentrations in Patients with Traumatic Brain Injury. J  
4  
5 Neurotrauma. 2017;34(11):1957-71.  
6  
7

8  
9 6. Lewis LM, Schloemann DT, Papa L, Fucetola RP, Bazarian J, Lindburg M, et al.  
10  
11 Utility of Serum Biomarkers in the Diagnosis and Stratification of Mild Traumatic Brain  
12  
13 Injury. Acad Emerg Med. 2017;24(6):710-20.  
14  
15

16  
17 7. Bazarian JJ, Biberthaler P, Welch RD, Lewis LM, Barzo P, Bogner-Flatz V, et al.  
18  
19 Serum GFAP and UCH-L1 for prediction of absence of intracranial injuries on head CT  
20  
21 (ALERT-TBI): a multicentre observational study. Lancet Neurol. 2018;17(9):782-9.  
22  
23  
24

25  
26 8. Papa L, Zonfrillo MR, Ramirez J, Silvestri S, Giordano P, Braga CF, et al.  
27  
28 Performance of Glial Fibrillary Acidic Protein in Detecting Traumatic Intracranial  
29  
30 Lesions on Computed Tomography in Children and Youth With Mild Head Trauma.  
31  
32 Acad Emerg Med. 2015;22(11):1274-82.  
33  
34  
35

36  
37 9. Papa L, Mittal MK, Ramirez J, Ramia M, Kirby S, Silvestri S, et al. In Children  
38  
39 and Youth with Mild and Moderate Traumatic Brain Injury, Glial Fibrillary Acidic  
40  
41 Protein Out-Performs S100beta in Detecting Traumatic Intracranial Lesions on  
42  
43 Computed Tomography. J Neurotrauma. 2016;33(1):58-64.  
44  
45  
46

47  
48 10. Papa L, Mittal MK, Ramirez J, Silvestri S, Giordano P, Braga CF, et al. Neuronal  
49  
50 Biomarker Ubiquitin C-Terminal Hydrolase Detects Traumatic Intracranial Lesions on  
51  
52 Computed Tomography in Children and Youth with Mild Traumatic Brain Injury. J  
53  
54 Neurotrauma. 2017;34(13):2132-40.  
55  
56  
57  
58  
59  
60

- 1  
2  
3 11. FDA authorizes marketing of first blood test to aid in the evaluation of concussion  
4 in adults. Silver Springs: US Food & Drug Administration; 2018  
5  
6 [https://www.fda.gov/NewsEvents/Newsroom/PressAnnouncements/ucm596531.htm].  
7  
8  
9
- 10  
11 12. Pelinka LE, Kroepfl A, Schmidhammer R, Krenn M, Buchinger W, Redl H, et al.  
12 Glial fibrillary acidic protein in serum after traumatic brain injury and multiple trauma. *J*  
13 *Trauma*. 2004;57(5):1006-12.  
14  
15  
16  
17
- 18  
19 20 13. Tate CM, Wang KK, Eonta S, Zhang Y, Carr W, Tortella FC, et al. Serum brain  
21 biomarker level, neurocognitive performance, and self-reported symptom changes in  
22 soldiers repeatedly exposed to low-level blast: a breacher pilot study. *J Neurotrauma*.  
23 2013;30(19):1620-30.  
24  
25  
26  
27
- 28  
29 30 14. Gavett BE, Stern RA, McKee AC. Chronic traumatic encephalopathy: a potential  
31 late effect of sport-related concussive and subconcussive head trauma. *Clin Sports Med*.  
32 2011;30(1):179-88, xi.  
33  
34  
35  
36
- 37  
38 39 15. Bailes JE, Dashnaw ML, Petraglia AL, Turner RC. Cumulative effects of  
40 repetitive mild traumatic brain injury. *Prog Neurol Surg*. 2014;28:50-62.  
41  
42  
43  
44
- 45 16. Huber BR, Alosco ML, Stein TD, McKee AC. Potential Long-Term  
46 Consequences of Concussive and Subconcussive Injury. *Phys Med Rehabil Clin N Am*.  
47 2016;27(2):503-11.  
48  
49  
50  
51
- 52  
53 54 17. Papa L, Wang KKW. Raising the Bar for Traumatic Brain Injury Biomarker  
55 Research: Methods Make a Difference. *J Neurotrauma*. 2017;34(13):2187-9.  
56  
57  
58  
59

- 1  
2  
3 18. Zhou Y, Kierans A, Kenul D, Ge Y, Rath J, Reaume J, et al. Mild traumatic brain  
4 injury: longitudinal regional brain volume changes. *Radiology*. 2013;267(3):880-90.  
5  
6  
7  
8  
9 19. Bailes JE, Petraglia AL, Omalu BI, Nauman E, Talavage T. Role of  
10 subconcussion in repetitive mild traumatic brain injury. *J Neurosurg*. 2013;119(5):1235-  
11 45.  
12  
13  
14  
15  
16  
17 20. Slobounov SM, Walter A, Breiter HC, Zhu DC, Bai X, Bream T, et al. The effect  
18 of repetitive subconcussive collisions on brain integrity in collegiate football players over  
19 a single football season: A multi-modal neuroimaging study. *Neuroimage Clin*.  
20 2017;14:708-18.  
21  
22  
23  
24  
25  
26  
27  
28 21. Reynolds BB, Stanton AN, Soldozy S, Goodkin HP, Wintermark M, Druzgal TJ.  
29 Investigating the effects of subconcussion on functional connectivity using mass-  
30 univariate and multivariate approaches. *Brain Imaging Behav*. 2017.  
31  
32  
33  
34  
35  
36 37 22. Johnson B, Neuberger T, Gay M, Hallett M, Slobounov S. Effects of  
38 subconcussive head trauma on the default mode network of the brain. *J Neurotrauma*.  
39 2014;31(23):1907-13.  
40  
41  
42  
43  
44  
45 46 23. Bahrami N, Sharma D, Rosenthal S, Davenport EM, Urban JE, Wagner B, et al.  
47 Subconcussive Head Impact Exposure and White Matter Tract Changes over a Single  
48 Season of Youth Football. *Radiology*. 2016;281(3):919-26.  
49  
50  
51  
52  
53  
54  
55  
56  
57  
58  
59  
60



- 1  
2  
3 24. Meier TB, Nelson LD, Huber DL, Bazarian JJ, Hayes RL, McCrea MA.  
4  
5 Prospective Assessment of Acute Blood Markers of Brain Injury in Sport-Related  
6  
7 Concussion. *J Neurotrauma*. 2017;34(22):3134-42.  
8  
9  
10  
11 25. Joseph JR, Swallow JS, Willsey K, Lapointe AP, Khalatbari S, Korley FK, et al.  
12  
13 Elevated markers of brain injury as a result of clinically asymptomatic high-acceleration  
14  
15 head impacts in high-school football athletes. *J Neurosurg*. 2018:1-7.  
16  
17  
18  
19 26. Papa L, Slobounov SM, Breiter HC, Walter A, Bream T, Seidenberg P, et al.  
20  
21 Elevations in MicroRNA Biomarkers in Serum Are Associated with Measures of  
22  
23 Concussion, Neurocognitive Function, and Subconcussive Trauma over a Single National  
24  
25 Collegiate Athletic Association Division I Season in Collegiate Football Players. *J*  
26  
27 *Neurotrauma*. 2019;36(8):1343-51.  
28  
29  
30  
31  
32 27. Papa L. Potential Blood-based Biomarkers for Concussion. *Sports Med Arthrosc*.  
33  
34 2016;24(3):108-15.  
35  
36  
37  
38 28. Papa L, Ramia MM, Kelly JM, Burks SS, Pawlowicz A, Berger RP. Systematic  
39  
40 review of clinical research on biomarkers for pediatric traumatic brain injury. *J*  
41  
42 *Neurotrauma*. 2013;30(5):324-38.  
43  
44  
45  
46 29. Papa L, Ramia MM, Edwards D, Johnson BD, Slobounov SM. Systematic review  
47  
48 of clinical studies examining biomarkers of brain injury in athletes after sports-related  
49  
50 concussion. *J Neurotrauma*. 2015;32(10):661-73.  
51  
52  
53  
54  
55  
56  
57  
58  
59  
60

## FIGURE LEGEND

**Figure 1. Flow diagram of screened and enrolled patients.**

**Figure 2. Temporal Profile of GFAP and UCH-L1 in three groups of trauma patients**

**Figure 2a. Temporal Profile of GFAP and UCH-L1 in body trauma control patients.**

Means with error bars representing standard error of the mean (SEM).

**Figure 2b. Temporal Profile of GFAP and UCH-L1 in head trauma control patients.**

Means with error bars representing standard error of the mean (SEM).

**Figure 2c. Temporal Profile of GFAP and UCH-L1 in trauma patients with**

**concussion.** Temporal Profile of GFAP and UCH-L1 in trauma patients with concussion.

Means with error bars representing standard error of the mean (SEM).

**Figure 3. Boxplot comparing initial levels of GFAP and UCH-L1 in three groups of trauma patients: 1) trauma controls without head trauma (controls), 2) head trauma controls without concussion (no concussion); and 3) head trauma with concussion (concussion).**

There were 47, 34, and 94 children in each group respectively and 145, 115, and 277 adult patients respectively. Medians with bars representing interquartile range (IQR).

**Figure 4. ROC Curves comparing initial levels of GFAP and UCH-L1 (individually and in combination) for predicting a concussion in trauma patients excluding patients with traumatic intracranial lesions on CT.**

## TABLES

Table 1. Characteristics of Enrolled Patients

| <i>Characteristics</i>    | <i>PEDIATIRC<br/>Trauma<br/>Patients<br/>without<br/>Head<br/>Trauma and<br/>Without<br/>Concussion<br/>(Trauma<br/>Controls)</i> | <i>PEDIATRIC<br/>Head<br/>Trauma<br/>Patients<br/>without<br/>Concussion<br/>(Head<br/>Trauma<br/>Controls)</i> | <i>PEDIATRIC<br/>Head<br/>Trauma<br/>Patients with<br/>Concussion<br/>(Concussion)</i> | <i>ADULT<br/>Trauma<br/>Patients<br/>without<br/>Head<br/>Trauma and<br/>Without<br/>Concussion<br/>(Trauma<br/>Controls)</i> | <i>ADULT<br/>Head<br/>Trauma<br/>Patients<br/>without<br/>Concussion<br/>(Head<br/>Trauma<br/>Controls)</i> | <i>ADULT<br/>Head<br/>Trauma<br/>Patients with<br/>Concussion<br/>(Concussion)</i> |
|---------------------------|-----------------------------------------------------------------------------------------------------------------------------------|-----------------------------------------------------------------------------------------------------------------|----------------------------------------------------------------------------------------|-------------------------------------------------------------------------------------------------------------------------------|-------------------------------------------------------------------------------------------------------------|------------------------------------------------------------------------------------|
|                           | <i>N=47</i>                                                                                                                       | <i>N=34</i>                                                                                                     | <i>N=94</i>                                                                            | <i>N=145</i>                                                                                                                  | <i>N=115</i>                                                                                                | <i>N=277</i>                                                                       |
| Mean age (yrs±SD)         | 9 (±4)                                                                                                                            | 6 (±5)                                                                                                          | 9 (±6)                                                                                 | 41 (±16)                                                                                                                      | 40 (±16)                                                                                                    | 39 (±15)                                                                           |
| Range                     | (0-17)                                                                                                                            | (1-16)                                                                                                          | (1-17)                                                                                 | (18-83)                                                                                                                       | (18-79)                                                                                                     | (18-78)                                                                            |
| Gender (%)                |                                                                                                                                   |                                                                                                                 |                                                                                        |                                                                                                                               |                                                                                                             |                                                                                    |
| Male                      | 33 (27)                                                                                                                           | 23 (19)                                                                                                         | 66 (54)                                                                                | 82 (25)                                                                                                                       | 68 (21)                                                                                                     | 182 (55)                                                                           |
| Female                    | 14 (26)                                                                                                                           | 11 (21)                                                                                                         | 28 (53)                                                                                | 63 (31)                                                                                                                       | 47 (23)                                                                                                     | 95 (46)                                                                            |
| Race (%)                  |                                                                                                                                   |                                                                                                                 |                                                                                        |                                                                                                                               |                                                                                                             |                                                                                    |
| Asian                     | 0 (0)                                                                                                                             | 1 (3)                                                                                                           | 1 (1)                                                                                  | 2 (1)                                                                                                                         | 0 (0)                                                                                                       | 6 (2)                                                                              |
| Black                     | 19 (40)                                                                                                                           | 5 (15)                                                                                                          | 31 (33)                                                                                | 41 (28)                                                                                                                       | 32 (28)                                                                                                     | 54 (20)                                                                            |
| Hispanic                  | 7 (15)                                                                                                                            | 13 (38)                                                                                                         | 17 (18)                                                                                | 39 (27)                                                                                                                       | 20 (17)                                                                                                     | 53 (19)                                                                            |
| Native American           | 0 (0)                                                                                                                             | 0 (0)                                                                                                           | 0 (0)                                                                                  | 3 (2)                                                                                                                         | 0 (0)                                                                                                       | 0 (0)                                                                              |
| White                     | 19 (40)                                                                                                                           | 15 (44)                                                                                                         | 42 (45)                                                                                | 57 (39)                                                                                                                       | 60 (52)                                                                                                     | 154 (56)                                                                           |
| Other                     | 2 (4)                                                                                                                             | 0 (0)                                                                                                           | 3 (3)                                                                                  | 3 (2)                                                                                                                         | 3 (3)                                                                                                       | 10 (4)                                                                             |
| Mechanism of Injury (%)   |                                                                                                                                   |                                                                                                                 |                                                                                        |                                                                                                                               |                                                                                                             |                                                                                    |
| Motor Vehicle Crash       | 3 (6)                                                                                                                             | 1 (3)                                                                                                           | 4 (4)                                                                                  | 94 (65)                                                                                                                       | 53 (46)                                                                                                     | 134 (48)                                                                           |
| Motorcycle Crash          | 0 (0)                                                                                                                             | 0 (0)                                                                                                           | 0 (0)                                                                                  | 0 (0)                                                                                                                         | 17 (15)                                                                                                     | 29 (11)                                                                            |
| Other Motorized Vehicle   | 0 (0)                                                                                                                             | 3 (9)                                                                                                           | 2 (2)                                                                                  | 0 (0)                                                                                                                         | 2 (2)                                                                                                       | 3 (1)                                                                              |
| Bicycle Struck by Vehicle | 0 (0)                                                                                                                             | 2 (6)                                                                                                           | 3 (3)                                                                                  | 3 (2)                                                                                                                         | 7 (6)                                                                                                       | 11 (4)                                                                             |
| Fall off Bicycle          | 0 (0)                                                                                                                             | 1 (3)                                                                                                           | 3 (3)                                                                                  | 1 (1)                                                                                                                         | 0 (0)                                                                                                       | 5 (2)                                                                              |
| Pedestrian Struck         | 1 (2)                                                                                                                             | 1 (3)                                                                                                           | 6 (6)                                                                                  | 4 (3)                                                                                                                         | 3 (3)                                                                                                       | 12 (4)                                                                             |
| Fall                      | 33 (70)                                                                                                                           | 17 (50)                                                                                                         | 42 (45)                                                                                | 20 (14)                                                                                                                       | 12 (10)                                                                                                     | 58 (21)                                                                            |
| Sports Injury             | 9 (19)                                                                                                                            | 5 (15)                                                                                                          | 23 (25)                                                                                | 7 (5)                                                                                                                         | 2 (2)                                                                                                       | 1 (<1)                                                                             |
| Assault                   | 0 (0)                                                                                                                             | 0 (0)                                                                                                           | 5 (5)                                                                                  | 0 (0)                                                                                                                         | 6 (5)                                                                                                       | 10 (4)                                                                             |
| Other                     | 1 (2)                                                                                                                             | 4 (12)                                                                                                          | 6 (6)                                                                                  | 16 (11)                                                                                                                       | 13 (11)                                                                                                     | 14 (5)                                                                             |
| Loss of Consciousness (%) |                                                                                                                                   |                                                                                                                 |                                                                                        |                                                                                                                               |                                                                                                             |                                                                                    |
| No                        | 47 (100)                                                                                                                          | 34 (100)                                                                                                        | 34 (36)                                                                                | 145 (100)                                                                                                                     | 115 (100)                                                                                                   | 55 (20)                                                                            |
| Yes                       | 0 (0)                                                                                                                             | 0 (0)                                                                                                           | 37 (39)                                                                                | 0 (0)                                                                                                                         | 0 (0)                                                                                                       | 222 (80)                                                                           |
| Unknown                   | 0 (0)                                                                                                                             | 0 (0)                                                                                                           | 23 (24)                                                                                | 0 (0)                                                                                                                         | 0 (0)                                                                                                       | 0 (0)                                                                              |
| Amnesia (%)               |                                                                                                                                   |                                                                                                                 |                                                                                        |                                                                                                                               |                                                                                                             |                                                                                    |
| No                        | 47 (100)                                                                                                                          | 34 (100)                                                                                                        | 36 (38)                                                                                | 145 (100)                                                                                                                     | 115 (100)                                                                                                   | 171 (62)                                                                           |
| Yes                       | 0 (0)                                                                                                                             | 0 (0)                                                                                                           | 17 (18)                                                                                | 0 (0)                                                                                                                         | 0 (0)                                                                                                       | 105 (20)                                                                           |
| Unknown                   | 0 (0)                                                                                                                             | 0 (0)                                                                                                           | 41 (44)                                                                                | 0 (0)                                                                                                                         | 0 (0)                                                                                                       | 1 (<1)                                                                             |

|                                |               |               |               |               |               |               |
|--------------------------------|---------------|---------------|---------------|---------------|---------------|---------------|
| Injury Severity Score (n=629)  |               |               |               |               |               |               |
| Median (IQR)                   | 4.0 (4.0-10)  | 2.0 (1.0-4.0) | 4.0 (1.0-7.0) | 4.0 (1.0-4.0) | 4.0 (2.0-6.5) | 5.0 (2.0-8.8) |
| Means (95%CI)                  | 6.0 (3.0-9.1) | 3.3 (2.1-4.6) | 4.5 (3.6-5.4) | 4.2 (3.5-4.9) | 4.6 (4.0-5.3) | 6.1 (5.5-6.8) |
| Admitted to Hospital (%)       | 12 (26)       | 8 (24)        | 29 (31)       | 42 (29)       | 17 (15)       | 101 (37)      |
| CT Head performed (%)          | 0 (0)         | 11 (32)       | 74 (79)       | 18 (12)       | 80 (70)       | 267 (96)      |
| Intracranial Lesions on CT (%) | 0 (0)         | 0 (0)         | 14 (16)       | 0 (0)         | 0 (0)         | 22 (6)        |

*Note: Due to rounding, percentages may not add up to 100*

**Table 2.** Area Under the Curve for distinguishing between concussion and **body trauma controls** (no head trauma and no concussion symptoms). Shown is the performance of GFAP and UCH-L1 alone and in combination.

| HOURS POST-INJURY                    | GFAP             | UCH-L1           | COMBINATION GFAP AND UCH-L1 |
|--------------------------------------|------------------|------------------|-----------------------------|
| <b>Enrollment (Children) (n=141)</b> | 0.80 (0.73-0.87) | 0.62 (0.53-0.72) | 0.80 (0.73-0.87)            |
| <b>Enrollment (Adults) (n=422)</b>   | 0.76 (0.71-0.80) | 0.69 (0.64-0.74) | 0.78 (0.73-0.82)            |
| <b>Enrollment (Both) (n= 563)</b>    | 0.76 (0.72-0.80) | 0.67 (0.63-0.72) | 0.78 (0.74-0.81)            |
| <b>4 hours (n= 452)</b>              | 0.76 (0.72-0.80) | 0.65 (0.60-0.70) | 0.77 (0.73-0.81)            |
| <b>8 hours (n=92)</b>                | 0.82 (0.72-0.91) | 0.72 (0.56-0.87) | 0.86 (0.75-0.96)            |
| <b>12 hours (n=68)</b>               | 0.83 (0.73-0.93) | 0.74 (0.58-0.90) | 0.85 (0.74-0.96)            |
| <b>16 hours (n=66)</b>               | 0.84 (0.73-0.95) | 0.77 (0.62-0.91) | 0.86 (0.75-0.97)            |
| <b>20 hours (n=61)</b>               | 0.82 (0.71-0.94) | 0.63 (0.43-0.84) | 0.82 (0.70-0.94)            |
| <b>24 hours (n=56)</b>               | 0.87 (0.76-0.98) | 0.74 (0.58-0.90) | 0.87 (0.74-1.00)            |
| <b>36 hours (n=35)</b>               | 0.86 (0.72-1.00) | 0.76 (0.51-1.00) | 0.90 (0.76-1.00)            |
| <b>48 hours (n=30)</b>               | 0.85 (0.68-1.00) | 0.71 (0.53-0.90) | 0.85 (0.65-1.00)            |
| <b>60 hours (n=27)</b>               | 0.79 (0.57-1.00) | 0.70 (0.50-0.90) | 0.83 (0.61-1.00)            |
| <b>72 hours (n=25)</b>               | 0.87 (0.71-1.00) | 0.78 (0.56-1.00) | 0.94 (0.82-1.00)            |
| <b>84 hours (n=15)</b>               | 0.89 (0.69-1.00) | 0.75 (0.40-1.00) | 0.89 (0.69-1.00)            |
| <b>96 hours (n=13)</b>               | 0.75 (0.39-1.00) | 0.54 (0.18-0.90) | 0.75 (0.49-1.00)            |
| <b>108 hours (n=6)</b>               | n/a              | n/a              | n/a                         |
| <b>120 hours (n=6)</b>               | 0.80 (0.40-1.00) | 0.50 (0.05-0.23) | 0.90 (0.62-1.00)            |
| <b>132 hours (n=2)</b>               | n/a              | n/a              | n/a                         |
| <b>144 hours (n=4)</b>               | n/a              | n/a              | n/a                         |
| <b>156 hours (n=4)</b>               | n/a              | n/a              | n/a                         |
| <b>168 hours (n=2)</b>               | n/a              | n/a              | n/a                         |

n/a – data not available

**Table 3.** Area Under the Curve for distinguishing between concussion and **head trauma controls** (no concussion symptoms) in patients with head trauma. Shown is the performance of GFAP and UCH-L1 alone and in combination.

| HOURS POST-INJURY                    | GFAP             | UCH-L1           | COMBINATION GFAP AND UCH-L1 |
|--------------------------------------|------------------|------------------|-----------------------------|
| <b>Enrollment (Children) (n=128)</b> | 0.64 (0.54-0.73) | 0.54 (0.43-0.66) | 0.63 (0.53-0.72)            |
| <b>Enrollment (Adults) (n=392)</b>   | 0.66 (0.61-0.71) | 0.58 (0.51-0.64) | 0.66 (0.61-0.72)            |
| <b>Enrollment (Both) (n= 520)</b>    | 0.65 (0.60-0.70) | 0.56 (0.51-0.62) | 0.65 (0.60-0.70)            |
| <b>4 hours (n= 421)</b>              | 0.62 (0.57-0.68) | 0.55 (0.49-0.61) | 0.62 (0.57-0.88)            |
| <b>8 hours (n=99)</b>                | 0.72 (0.61-0.82) | 0.61 (0.49-0.73) | 0.72 (0.61-0.82)            |
| <b>12 hours (n=74)</b>               | 0.69 (0.55-0.82) | 0.51 (0.37-0.66) | 0.67 (0.54-0.80)            |
| <b>16 hours (n=69)</b>               | 0.76 (0.64-0.88) | 0.58 (0.39-0.76) | 0.74 (0.62-0.85)            |
| <b>20 hours (n=65)</b>               | 0.68 (0.53-0.83) | 0.41 (0.23-0.59) | 0.66 (0.52-0.81)            |
| <b>24 hours (n=64)</b>               | 0.74 (0.60-0.88) | 0.40 (0.24-0.56) | 0.72 (0.59-0.86)            |
| <b>36 hours (n=44)</b>               | 0.76 (0.61-0.91) | 0.56 (0.37-0.75) | 0.76 (0.61-0.92)            |
| <b>48 hours (n=38)</b>               | 0.81 (0.67-0.95) | 0.52 (0.32-0.73) | 0.79 (0.64-0.93)            |
| <b>60 hours (n=31)</b>               | 0.86 (0.73-1.00) | 0.54 (0.34-0.74) | 0.86 (0.73-1.00)            |
| <b>72 hours (n=30)</b>               | 0.78 (0.60-0.95) | 0.43 (0.20-0.66) | 0.71 (0.51-0.91)            |
| <b>84 hours (n=19)</b>               | 0.84 (0.65-1.00) | 0.37 (0.13-0.62) | 0.74 (0.52-0.97)            |
| <b>96 hours (n=16)</b>               | 0.75 (0.51-0.99) | 0.28 (0.02-0.55) | 0.65 (0.38-0.91)            |
| <b>108 hours (n=8)</b>               | 0.67 (0.26-1.00) | 0.17 (0-0.47)    | 0.33 (0-0.71)               |
| <b>120 hours (n=7)</b>               | 0.80 (0.46-1.00) | 0.20 (0-0.58)    | 0.70 (0.30-1.00)            |
| <b>132 hours (n=4)</b>               | 0.75 (0.20-1.00) | 0 (0-0)          | 0.50 (0-1.00)               |
| <b>144 hours (n=6)</b>               | 0.75 (0.20-1.00) | 0 (0-0)          | 0.50 (0.01-0.99)            |
| <b>156 hours (n=6)</b>               | 0.75 (0.34-1.00) | 0 (0-0)          | 0.50 (0.01-0.99)            |
| <b>168 hours (n=4)</b>               | 0.75 (0.20-1.00) | 0.13 (0-1.00)    | 0.63 (0-1.00)               |

**Table 4.** Area Under the Curve for distinguishing between concussion and **all trauma controls** (head and body controls with no concussion). Shown is the performance of GFAP and UCH-L1 alone and in combination.

| <b>HOURS POST-INJURY trauma</b>      | <b>GFAP</b>      | <b>UCH-L1</b>    | <b>COMBINATION GFAP AND UCH-L1</b> |
|--------------------------------------|------------------|------------------|------------------------------------|
| <b>Enrollment (Children) (n=175)</b> | 0.73 (0.66-0.81) | 0.59 (0.51-0.67) | 0.73 (0.65-0.80)                   |
| <b>Enrollment (Adults) (n=537)</b>   | 0.71 (0.67-0.76) | 0.64 (0.59-0.69) | 0.73 (0.68-0.77)                   |
| <b>Enrollment (Both) (n= 712)</b>    | 0.71 (0.67-0.75) | 0.63 (0.59-0.67) | 0.72 (0.68-0.76)                   |
| <b>4 hours (n= 567)</b>              | 0.70 (0.66-0.74) | 0.61 (0.56-0.65) | 0.70 (0.66-0.75)                   |
| <b>8 hours (n=109)</b>               | 0.75 (0.66-0.84) | 0.65 (0.54-0.75) | 0.77 (0.68-0.86)                   |
| <b>12 hours (n=80)</b>               | 0.73 (0.62-0.85) | 0.59 (0.46-0.72) | 0.73 (0.62-0.85)                   |
| <b>16 hours (n=73)</b>               | 0.79 (0.69-0.90) | 0.64 (0.49-0.80) | 0.78 (0.68-0.89)                   |
| <b>20 hours (n=70)</b>               | 0.73 (0.61-0.86) | 0.49 (0.33-0.65) | 0.72 (0.59-0.84)                   |
| <b>24 hours (n=67)</b>               | 0.77 (0.64-0.89) | 0.47 (0.31-0.63) | 0.75 (0.63-0.88)                   |
| <b>36 hours (n=46)</b>               | 0.77 (0.63-0.91) | 0.59 (0.41-0.77) | 0.78 (0.64-0.92)                   |
| <b>48 hours (n=40)</b>               | 0.81 (0.68-0.95) | 0.55 (0.37-0.74) | 0.80 (0.66-0.93)                   |
| <b>60 hours (n=33)</b>               | 0.85 (0.71-0.98) | 0.58 (0.39-0.77) | 0.86 (0.73-0.98)                   |
| <b>72 hours (n=32)</b>               | 0.80 (0.64-0.95) | 0.51 (0.29-0.73) | 0.76 (0.59-0.94)                   |
| <b>84 hours (n=20)</b>               | 0.85 (0.67-1.00) | 0.44 (0.18-0.69) | 0.77 (0.56-0.98)                   |
| <b>96 hours (n=17)</b>               | 0.75 (0.51-0.98) | 0.33 (0.07-0.60) | 0.67 (0.41-0.92)                   |
| <b>108 hours (n=8)</b>               | 0.67 (0.26-1.00) | 0.17 (0-0.47)    | 0.33 (0-0.71)                      |
| <b>120 hours (n=8)</b>               | 0.80 (0.48-1.00) | 0.30 (0-0.69)    | 0.77 (0.42-1.00)                   |
| <b>132 hours (n=4)</b>               | 0.75 (0.20-1.00) | 0 (0-0)          | 0.50 (0-1.00)                      |
| <b>144 hours (n=6)</b>               | 0.75 (0.34-1.00) | 0 (0-0)          | 0.50 (0.01-0.99)                   |
| <b>156 hours (n=6)</b>               | 0.75 (0.34-1.00) | 0.38 (0-0.85)    | 0.63 (0.15-1.00)                   |
| <b>168 hours (n=4)</b>               | 0.75 (0.20-1.00) | 0.13 (0-1.00)    | 0.63 (0-1.00)                      |

Figure 1. Flow diagram of screened and enrolled patients





**Figure 2.** Temporal Profile of GFAP and UCH-L1 in three groups of trauma patients



**Figure 3.** Boxplot comparing initial levels of GFAP and UCH-L1 in three groups of trauma patients: 1) trauma controls without head trauma (controls), 2) head trauma controls without concussion (no concussion); and 3) head trauma with concussion (concussion).

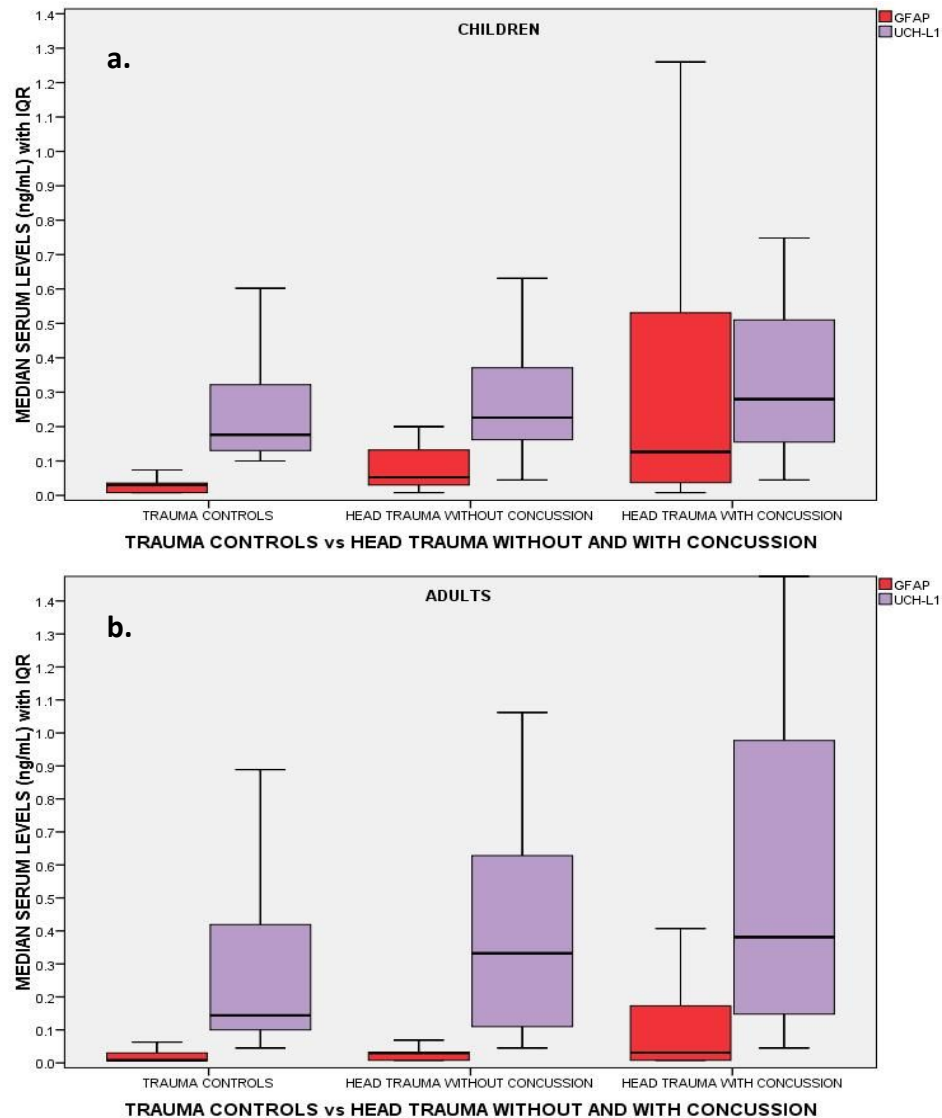

| MULTIPLE COMPARISONS                  | CHILDREN<br>N=175 | ADULTS<br>N=537 |
|---------------------------------------|-------------------|-----------------|
| <b>GFAP</b>                           |                   |                 |
| Trauma Control vs Head Trauma Control | <0.001            | <0.001          |
| Trauma Control vs Concussion          | <0.001            | <0.001          |
| Head Trauma Control vs Concussion     | <0.001            | <0.001          |
| <b>UCH-L1</b>                         |                   |                 |
| Trauma Control vs Head Trauma Control | 0.410             | 0.002           |
| Trauma Control vs Concussion          | 0.045             | <0.001          |
| Head Trauma Control vs Concussion     | 0.894             | 0.017           |

\*Controlled for multiple comparisons

**Figure 4.** ROC Curves comparing initial levels of GFAP and UCH-L1 (individually and in combination) for predicting a concussion in trauma patients excluding patients with traumatic intracranial lesions on CT.



| CONCUSSION VS NO CONCUSSION<br>(EXCLUDING PATIENTS WITH POSITIVE CT) | CHILDREN<br>N=175       | ADULTS<br>N=537         | *ALL PATIENTS<br>N=712  |
|----------------------------------------------------------------------|-------------------------|-------------------------|-------------------------|
| Concussion vs Body Trauma (No Concussion)                            | n=80 & n=47             | n=255 & n=145           | n=335 & n=149           |
| GFAP                                                                 | <b>0.77</b> (0.68-0.85) | <b>0.74</b> (0.69-0.79) | <b>0.74</b> (0.70-0.78) |
| UCH-L1                                                               | <b>0.58</b> (0.48-0.69) | <b>0.68</b> (0.62-0.73) | <b>0.66</b> (0.61-0.70) |
| GFAP & UCH-L1                                                        | <b>0.76</b> (0.68-0.84) | <b>0.76</b> (0.72-0.81) | <b>0.76</b> (0.72-0.80) |
| Concussion vs Head Trauma (No Concussion)                            | n=80 & n=34             | n=255 & n=115           | n=335 & n=192           |
| GFAP                                                                 | 0.58 (0.47-0.68)        | 0.64 (0.58-0.70)        | 0.62 (0.57-0.67)        |
| UCH-L1                                                               | 0.50 (0.39-0.62)        | 0.56 (0.50-0.62)        | 0.54 (0.49-0.60)        |
| GFAP & UCH-L1                                                        | 0.57 (0.46-0.67)        | 0.64 (0.58-0.70)        | 0.62 (0.57-0.67)        |
| Concussion vs Head and Body Trauma Controls                          | n=80 & n=81             | n=255 & n=260           | n=335 & n=341           |
| GFAP                                                                 | 0.69 (0.60-0.77)        | 0.70 (0.65-0.74)        | 0.69 (0.65-0.73)        |
| UCH-L1                                                               | 0.55 (0.46-0.64)        | 0.63 (0.58-0.67)        | 0.61 (0.56-0.65)        |
| GFAP & UCH-L1                                                        | 0.68 (0.60-0.76)        | 0.71 (0.66-0.75)        | 0.70 (0.66-0.74)        |

\*Depicted in the ROC curve graphs
